# Supplementary material
Source: MDPI journal article supplement (https://www.mdpi.com/2072-4292/16/6/1049)
Supplement: s1 [file s1]

## Comparing pixel- and object-based approaches for classifying multispectral drone imagery of a coastal wetland restoration and reference site

Gregory S. Norris, Armand LaRocque, Brigitte Leblon, Myriam A. Barbeau, and Alan R. Hanson

### Supplementary material

**Table S1.** Photographs of vegetative landcover classes taken in June, July, and August 2021 (\* indicates photographs taken in 2022).

| Class Number | Class Name                                              | June                                                                                | July                                                                                 | August                                                                                |
|--------------|---------------------------------------------------------|-------------------------------------------------------------------------------------|--------------------------------------------------------------------------------------|---------------------------------------------------------------------------------------|
| 5            | <i>Spartina alterniflora</i> (muddy)                    |    |    |    |
| 6            | <i>Spartina alterniflora</i> (clean, dense)             |   |   |   |
| 7            | <i>Spartina patens</i>                                  |  |  |  |
| 12 & 15      | <i>Spartina pectinata</i> and Dike vegetation (circled) |  |  |  |
| 13           | <i>Spartina alterniflora</i> (clean, sparse)            |  |  |  |
| 16           | <i>Triglochin maritima</i>                              |  |  |  |
| 17           | Mixed mid-elevation vegetation                          |  |  |  |

| Class Number | Class Name                                           | June                                                                              | July                                                                               | August                                                                              |
|--------------|------------------------------------------------------|-----------------------------------------------------------------------------------|------------------------------------------------------------------------------------|-------------------------------------------------------------------------------------|
| 30           | <i>S. alterniflora</i> and<br><i>S. patens</i> mixed |  |  |  |



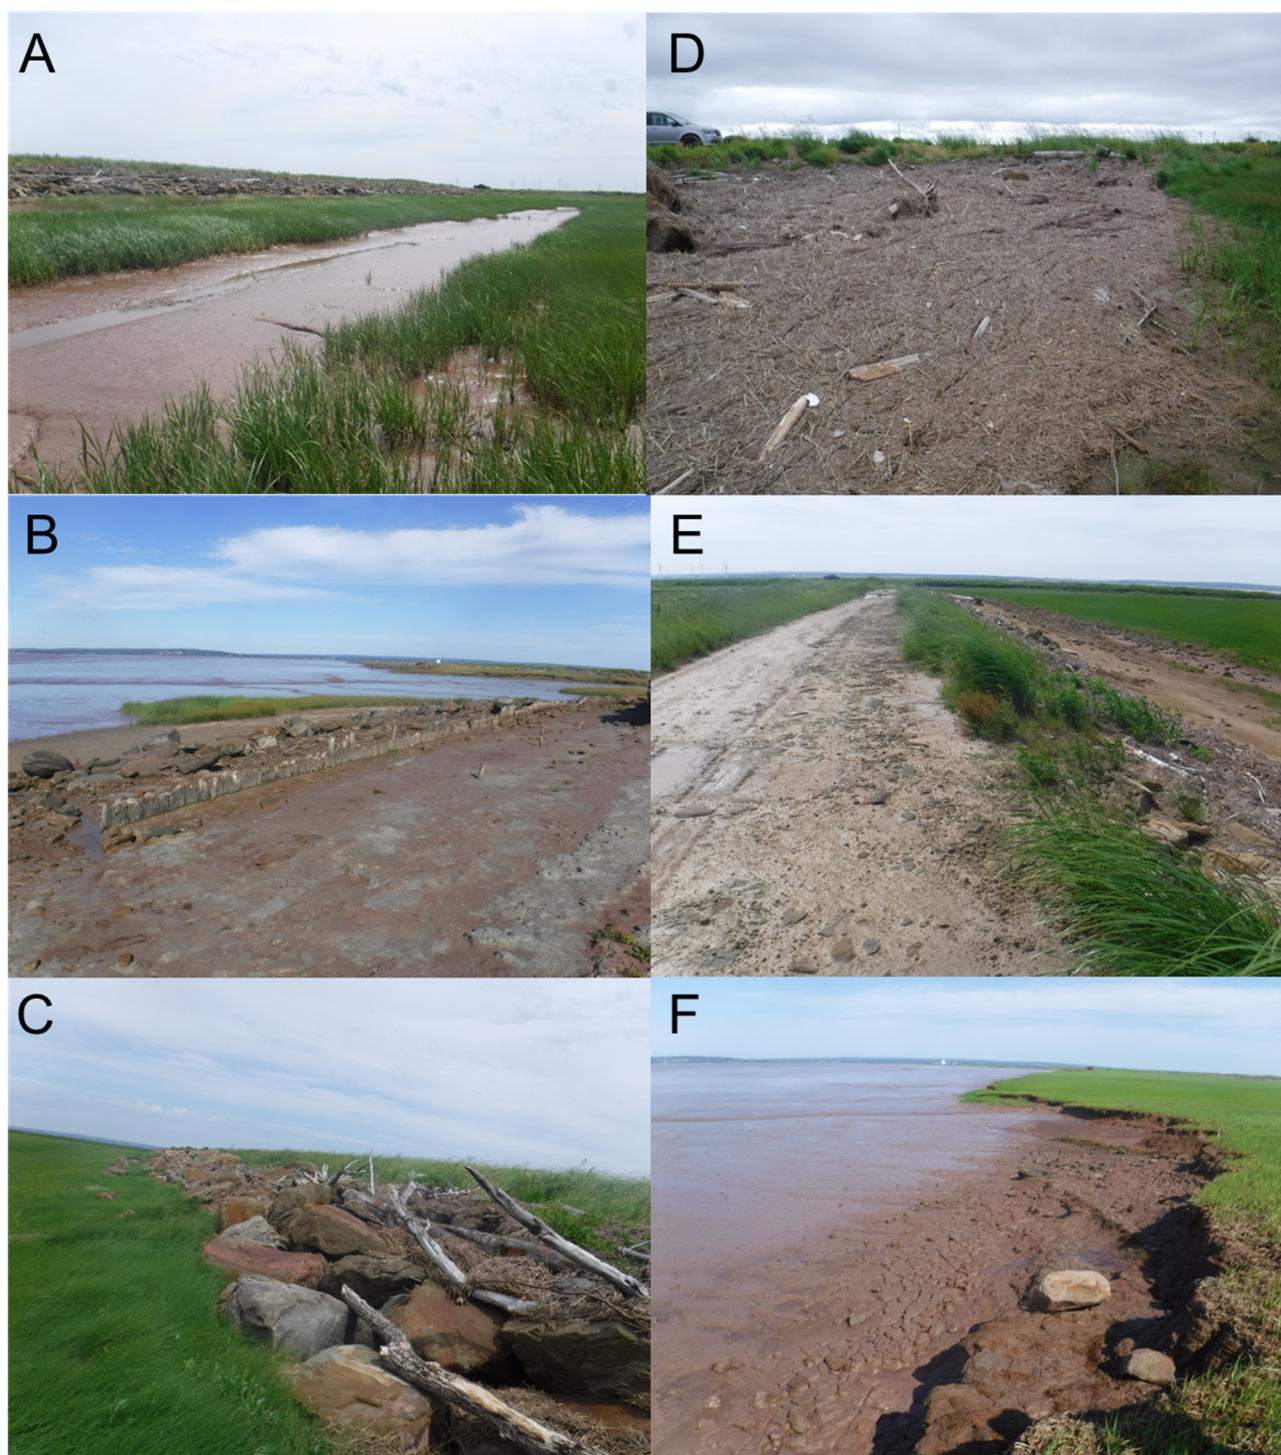

**Figure S1.** Photographs of the landcover classes A) bare mud exposed to air (Class 1), B) dark compacted soil (Class 2), C) rocks and wood (Classes 3 and 11, respectively), D) wrack (Class 4), and E) light compacted soil (Class 10). F) shows the erosion occurring on the seaward marsh edge. Photograph F was taken in the Aulac salt marsh Reference (Site A), and photographs A–E were taken in the Restoration (Site B). Photographs were taken on D) August 2021; A,E,C,F) July 2022, and B) August 2022.



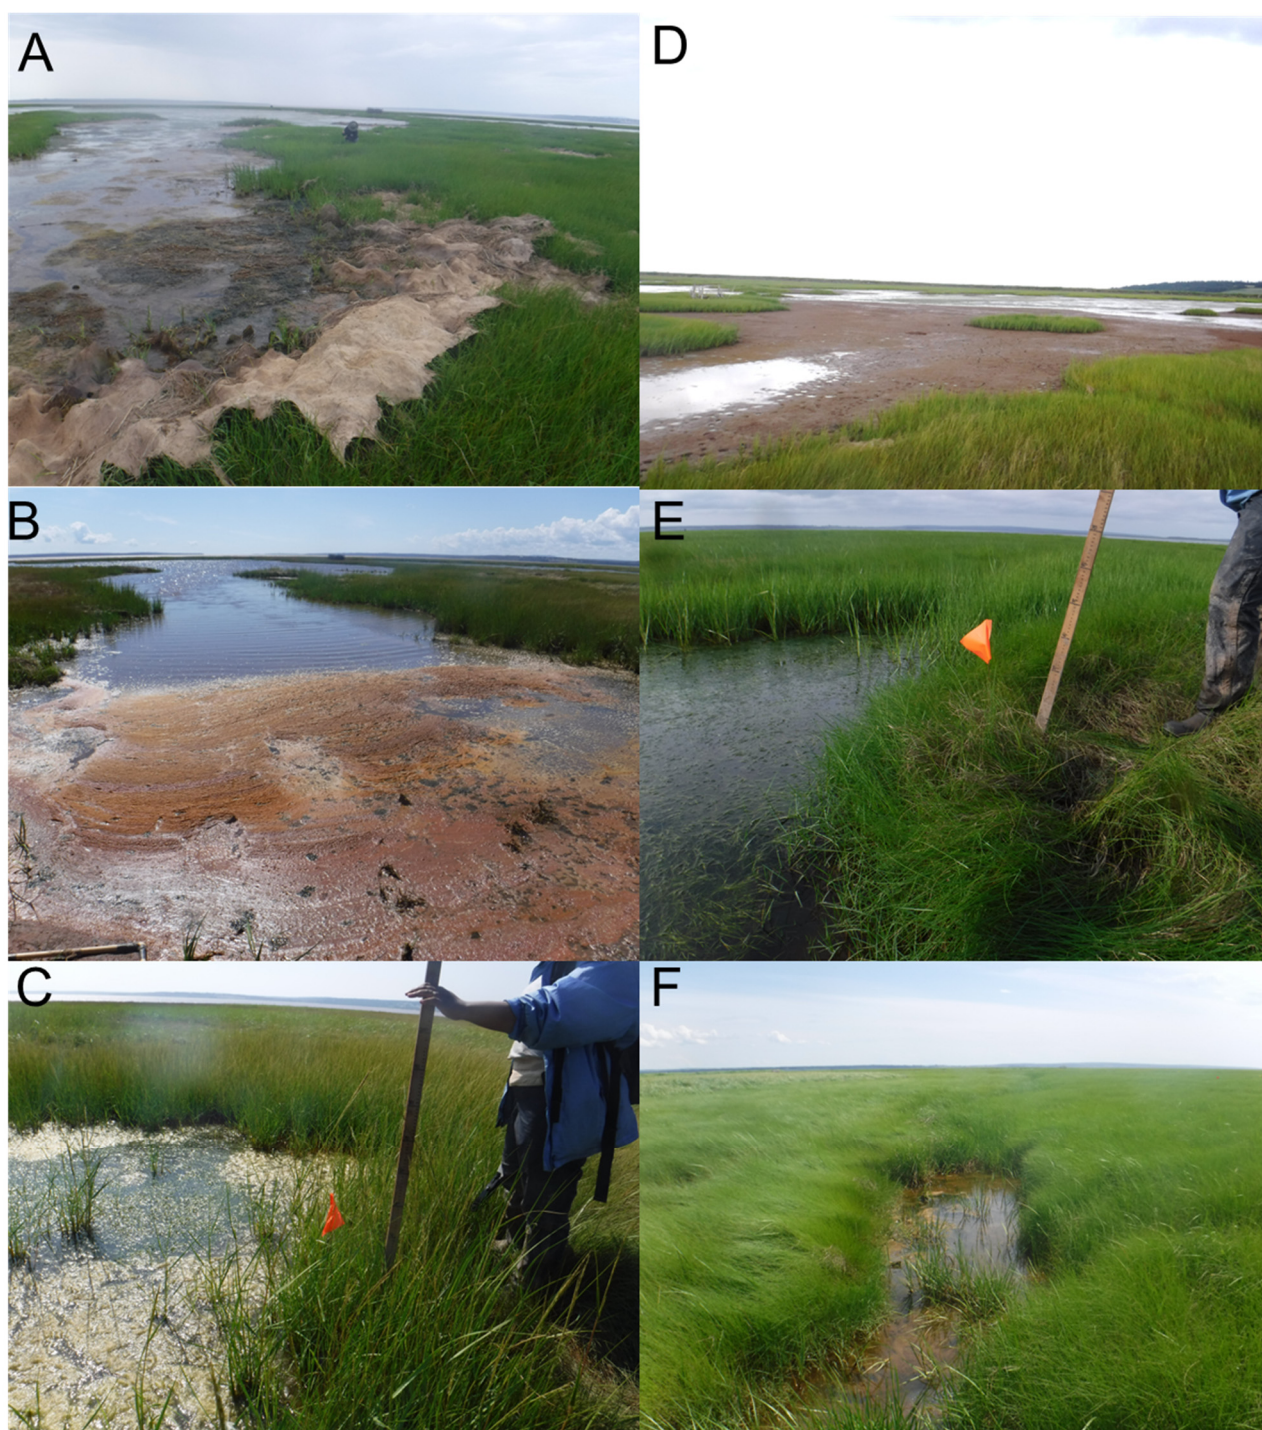

**Figure S2.** Photographs of landcover classes A) wrack and floating green algae (Classes 4 and 18, respectively), B) deep salt pool water and floating green algae (Classes 8 and 18, respectively), C) floating green algae (Class 18), D) emerged salt pool mud and shallow salt pool water (Classes 20 and 25, respectively), E) submerged aquatic vegetation (Class 21), and F) shallow salt pool water (Class 25). Photographs taken in the Aulac salt marsh Reference site (site A) showing the variability of salt pools. Photographs taken on E) June 2021; D) August 2021; A,B,F) July 2022; C) August 2022.

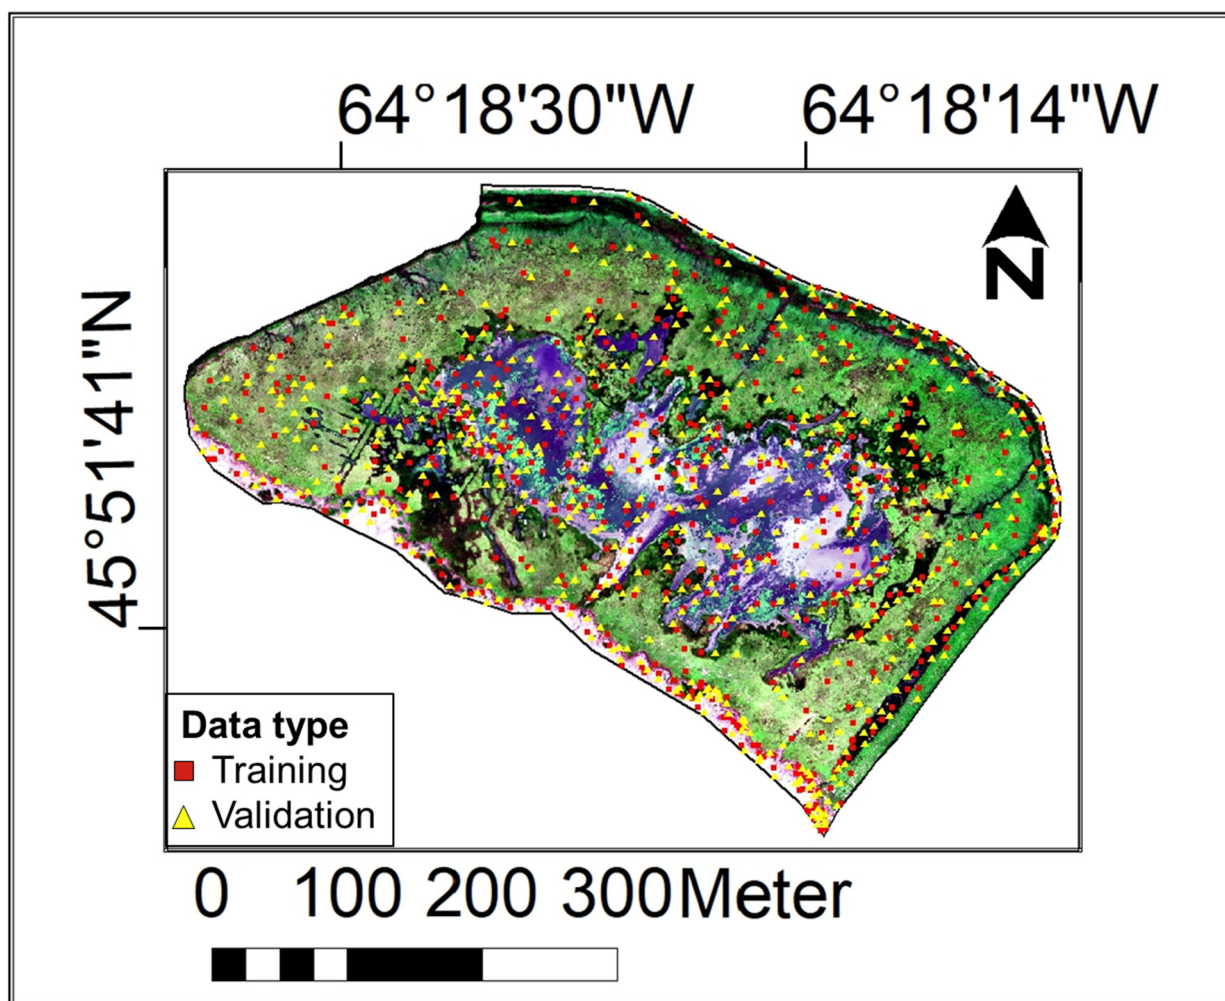

**Figure S3.** Map showing the spatial distribution of training and validation data points in the Reference site (Site A) for 2021. Training data points are represented by red squares and validation data points by yellow triangles.



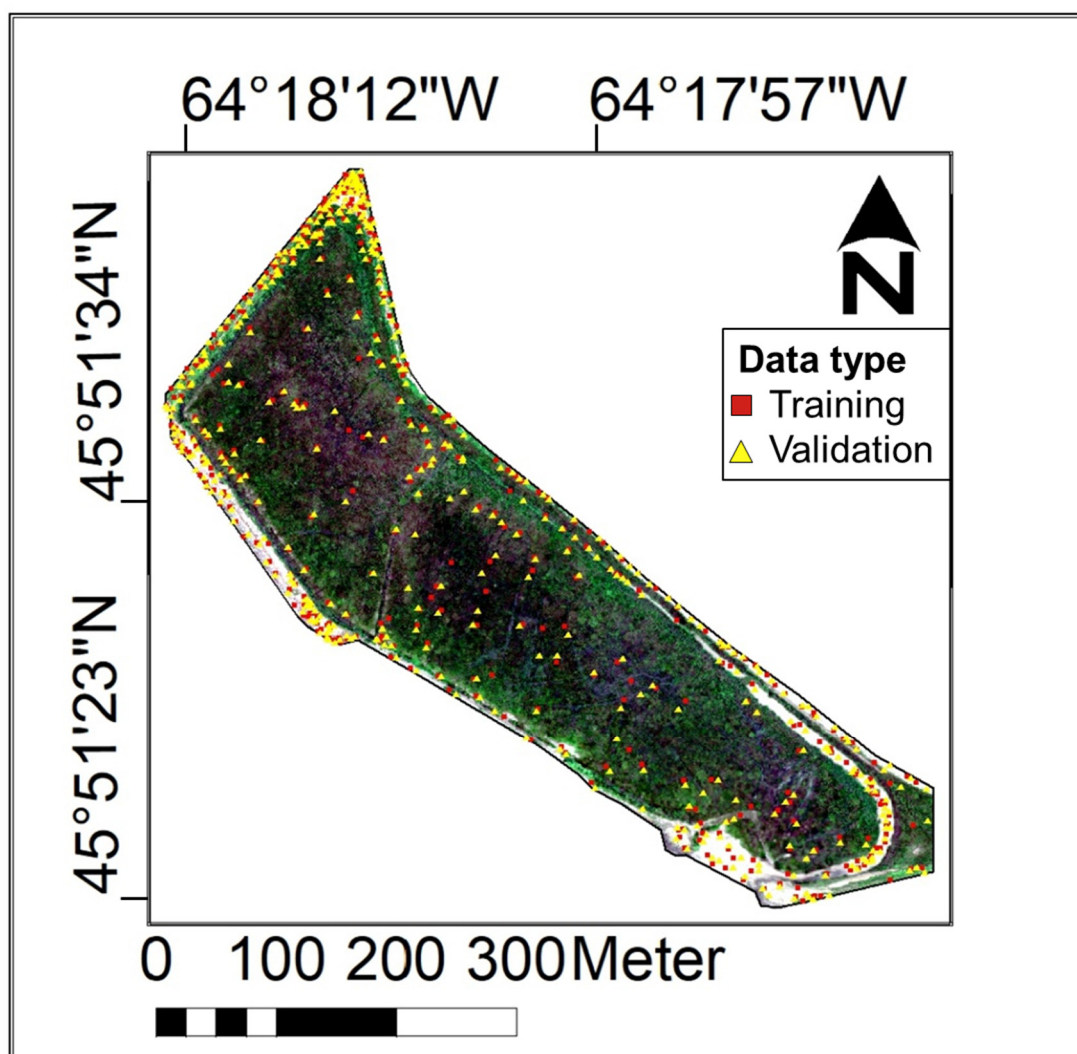

**Figure S4.** Map showing the spatial distribtuion of training and validation data points in the Restoration site (Site B) for 2021. Training data points are represented by red squares and validation data points by yellow triangles.

**Table S2.** J-M distance values for the Reference site (Site A) landcover classes using 10 band multispectral imagery acquired in June, July, and August 2021. See Table 5 for class numbers and descriptions.

| Month                         | Class # | 1    | 2    | 3    | 4    | 5    | 6    | 7    | 8    | 9    | 16   | 17   | 18   | 19   | 20   | 21   | 22   | 23   | 24   | 25   | 26   | 27   | 28   | 29   |      |
|-------------------------------|---------|------|------|------|------|------|------|------|------|------|------|------|------|------|------|------|------|------|------|------|------|------|------|------|------|
| June                          | 2       | 1.96 |      |      |      |      |      |      |      |      |      |      |      |      |      |      |      |      |      |      |      |      |      |      |      |
|                               | 3       | 1.96 | 1.85 |      |      |      |      |      |      |      |      |      |      |      |      |      |      |      |      |      |      |      |      |      |      |
|                               | 4       | 2.00 | 2.00 | 2.00 |      |      |      |      |      |      |      |      |      |      |      |      |      |      |      |      |      |      |      |      |      |
|                               | 5       | 2.00 | 2.00 | 2.00 | 2.00 |      |      |      |      |      |      |      |      |      |      |      |      |      |      |      |      |      |      |      |      |
|                               | 6       | 2.00 | 2.00 | 2.00 | 2.00 | 2.00 |      |      |      |      |      |      |      |      |      |      |      |      |      |      |      |      |      |      |      |
|                               | 7       | 2.00 | 2.00 | 2.00 | 2.00 | 2.00 | 1.56 |      |      |      |      |      |      |      |      |      |      |      |      |      |      |      |      |      |      |
|                               | 8       | 2.00 | 2.00 | 2.00 | 2.00 | 2.00 | 2.00 | 2.00 |      |      |      |      |      |      |      |      |      |      |      |      |      |      |      |      |      |
|                               | 9       | 2.00 | 2.00 | 2.00 | 2.00 | 1.85 | 1.87 | 1.97 | 2.00 |      |      |      |      |      |      |      |      |      |      |      |      |      |      |      |      |
|                               | 16      | 2.00 | 2.00 | 2.00 | 2.00 | 1.78 | 1.99 | 1.98 | 2.00 | 1.94 |      |      |      |      |      |      |      |      |      |      |      |      |      |      |      |
|                               | 17      | 2.00 | 2.00 | 2.00 | 2.00 | 2.00 | 1.68 | 1.21 | 2.00 | 1.93 | 1.94 |      |      |      |      |      |      |      |      |      |      |      |      |      |      |
|                               | 18      | 2.00 | 2.00 | 2.00 | 2.00 | 2.00 | 2.00 | 2.00 | 2.00 | 2.00 | 2.00 | 2.00 |      |      |      |      |      |      |      |      |      |      |      |      |      |
|                               | 19      | 1.96 | 2.00 | 1.95 | 2.00 | 2.00 | 2.00 | 2.00 | 2.00 | 2.00 | 2.00 | 2.00 | 2.00 |      |      |      |      |      |      |      |      |      |      |      |      |
|                               | 20      | 1.94 | 2.00 | 1.98 | 2.00 | 2.00 | 2.00 | 2.00 | 2.00 | 2.00 | 2.00 | 2.00 | 2.00 | 1.95 |      |      |      |      |      |      |      |      |      |      |      |
|                               | 21      | 2.00 | 2.00 | 2.00 | 2.00 | 2.00 | 2.00 | 2.00 | 2.00 | 2.00 | 2.00 | 2.00 | 2.00 | 1.94 | 2.00 | 2.00 |      |      |      |      |      |      |      |      |      |
|                               | 22      | 2.00 | 2.00 | 2.00 | 2.00 | 2.00 | 2.00 | 2.00 | 2.00 | 2.00 | 2.00 | 2.00 | 2.00 | 1.48 | 2.00 | 2.00 | 1.99 |      |      |      |      |      |      |      |      |
|                               | 23      | 2.00 | 2.00 | 2.00 | 2.00 | 2.00 | 2.00 | 2.00 | 2.00 | 2.00 | 2.00 | 2.00 | 2.00 | 1.98 | 2.00 | 2.00 | 1.30 | 2.00 |      |      |      |      |      |      |      |
|                               | 24      | 2.00 | 2.00 | 2.00 | 2.00 | 2.00 | 2.00 | 2.00 | 2.00 | 2.00 | 2.00 | 2.00 | 2.00 | 1.99 | 2.00 | 2.00 | 1.93 | 2.00 | 1.81 |      |      |      |      |      |      |
|                               | 25      | 2.00 | 2.00 | 1.99 | 2.00 | 2.00 | 2.00 | 2.00 | 2.00 | 1.99 | 2.00 | 2.00 | 2.00 | 2.00 | 1.86 | 2.00 | 2.00 | 2.00 | 2.00 | 2.00 |      |      |      |      |      |
|                               | 26      | 2.00 | 2.00 | 2.00 | 2.00 | 2.00 | 2.00 | 2.00 | 2.00 | 2.00 | 2.00 | 2.00 | 2.00 | 1.96 | 2.00 | 2.00 | 1.56 | 2.00 | 1.58 | 1.96 | 2.00 |      |      |      |      |
|                               | 27      | 2.00 | 2.00 | 1.99 | 2.00 | 2.00 | 2.00 | 2.00 | 2.00 | 2.00 | 2.00 | 2.00 | 2.00 | 2.00 | 1.81 | 2.00 | 2.00 | 2.00 | 2.00 | 2.00 | 1.68 | 2.00 |      |      |      |
| 28                            | 2.00    | 2.00 | 2.00 | 2.00 | 2.00 | 2.00 | 2.00 | 2.00 | 1.72 | 2.00 | 2.00 | 2.00 | 2.00 | 2.00 | 2.00 | 2.00 | 2.00 | 2.00 | 2.00 | 1.96 | 2.00 | 2.00 |      |      |      |
| 29                            | 2.00    | 2.00 | 2.00 | 2.00 | 2.00 | 1.87 | 1.50 | 1.67 | 2.00 | 1.73 | 1.59 | 1.70 | 2.00 | 2.00 | 2.00 | 2.00 | 2.00 | 2.00 | 2.00 | 2.00 | 2.00 | 2.00 | 2.00 |      |      |
| 30                            | 2.00    | 2.00 | 2.00 | 2.00 | 2.00 | 1.83 | 1.82 | 1.79 | 2.00 | 1.77 | 1.51 | 1.53 | 2.00 | 2.00 | 2.00 | 2.00 | 2.00 | 2.00 | 2.00 | 2.00 | 2.00 | 2.00 | 2.00 | 2.00 | 1.34 |
| *Average: 1.96, Minimum: 1.21 |         |      |      |      |      |      |      |      |      |      |      |      |      |      |      |      |      |      |      |      |      |      |      |      |      |

| Month                         | Class # | 1    | 2    | 3    | 4    | 5    | 6    | 7    | 8    | 9    | 16   | 17   | 18   | 19   | 20   | 21   | 22   | 23   | 24   | 25   | 26   | 27   | 28   | 29   |      |  |
|-------------------------------|---------|------|------|------|------|------|------|------|------|------|------|------|------|------|------|------|------|------|------|------|------|------|------|------|------|--|
| July                          | 2       | 1.99 |      |      |      |      |      |      |      |      |      |      |      |      |      |      |      |      |      |      |      |      |      |      |      |  |
|                               | 3       | 1.98 | 1.90 |      |      |      |      |      |      |      |      |      |      |      |      |      |      |      |      |      |      |      |      |      |      |  |
|                               | 4       | 2.00 | 2.00 | 1.99 |      |      |      |      |      |      |      |      |      |      |      |      |      |      |      |      |      |      |      |      |      |  |
|                               | 5       | 2.00 | 2.00 | 2.00 | 2.00 |      |      |      |      |      |      |      |      |      |      |      |      |      |      |      |      |      |      |      |      |  |
|                               | 6       | 2.00 | 2.00 | 2.00 | 2.00 | 1.95 |      |      |      |      |      |      |      |      |      |      |      |      |      |      |      |      |      |      |      |  |
|                               | 7       | 2.00 | 2.00 | 2.00 | 2.00 | 1.98 | 1.26 |      |      |      |      |      |      |      |      |      |      |      |      |      |      |      |      |      |      |  |
|                               | 8       | 2.00 | 2.00 | 2.00 | 2.00 | 2.00 | 2.00 | 2.00 |      |      |      |      |      |      |      |      |      |      |      |      |      |      |      |      |      |  |
|                               | 9       | 2.00 | 2.00 | 1.96 | 2.00 | 1.70 | 1.95 | 1.95 | 2.00 |      |      |      |      |      |      |      |      |      |      |      |      |      |      |      |      |  |
|                               | 16      | 2.00 | 2.00 | 2.00 | 2.00 | 1.83 | 1.98 | 1.91 | 2.00 | 1.97 |      |      |      |      |      |      |      |      |      |      |      |      |      |      |      |  |
|                               | 17      | 2.00 | 2.00 | 2.00 | 2.00 | 1.91 | 1.72 | 1.07 | 2.00 | 1.84 | 1.84 |      |      |      |      |      |      |      |      |      |      |      |      |      |      |  |
|                               | 18      | 2.00 | 2.00 | 1.99 | 2.00 | 2.00 | 2.00 | 2.00 | 2.00 | 2.00 | 2.00 | 2.00 |      |      |      |      |      |      |      |      |      |      |      |      |      |  |
|                               | 19      | 2.00 | 2.00 | 2.00 | 2.00 | 2.00 | 2.00 | 2.00 | 2.00 | 2.00 | 2.00 | 2.00 | 2.00 |      |      |      |      |      |      |      |      |      |      |      |      |  |
|                               | 20      | 1.96 | 2.00 | 1.99 | 2.00 | 2.00 | 2.00 | 2.00 | 2.00 | 2.00 | 2.00 | 2.00 | 2.00 | 2.00 |      |      |      |      |      |      |      |      |      |      |      |  |
|                               | 21      | 2.00 | 2.00 | 2.00 | 2.00 | 2.00 | 2.00 | 2.00 | 2.00 | 2.00 | 2.00 | 2.00 | 2.00 | 1.64 | 2.00 | 2.00 |      |      |      |      |      |      |      |      |      |  |
|                               | 22      | 2.00 | 2.00 | 2.00 | 2.00 | 2.00 | 2.00 | 2.00 | 2.00 | 2.00 | 2.00 | 2.00 | 2.00 | 1.48 | 2.00 | 2.00 | 1.65 |      |      |      |      |      |      |      |      |  |
|                               | 23      | 2.00 | 2.00 | 2.00 | 2.00 | 2.00 | 2.00 | 2.00 | 2.00 | 2.00 | 2.00 | 2.00 | 2.00 | 1.76 | 2.00 | 2.00 | 1.87 | 1.51 |      |      |      |      |      |      |      |  |
|                               | 24      | 2.00 | 2.00 | 2.00 | 2.00 | 2.00 | 2.00 | 2.00 | 2.00 | 1.18 | 2.00 | 2.00 | 2.00 | 2.00 | 2.00 | 2.00 | 2.00 | 1.99 | 1.98 |      |      |      |      |      |      |  |
|                               | 25      | 2.00 | 2.00 | 2.00 | 2.00 | 2.00 | 2.00 | 2.00 | 2.00 | 2.00 | 2.00 | 2.00 | 2.00 | 2.00 | 1.96 | 2.00 | 2.00 | 2.00 | 2.00 | 2.00 |      |      |      |      |      |  |
|                               | 26      | 2.00 | 2.00 | 2.00 | 2.00 | 2.00 | 2.00 | 2.00 | 2.00 | 2.00 | 2.00 | 2.00 | 2.00 | 1.97 | 2.00 | 2.00 | 1.94 | 1.93 | 1.95 | 2.00 | 1.95 |      |      |      |      |  |
|                               | 27      | 2.00 | 2.00 | 2.00 | 2.00 | 2.00 | 2.00 | 2.00 | 2.00 | 2.00 | 2.00 | 2.00 | 2.00 | 1.77 | 2.00 | 2.00 | 1.68 | 1.54 | 1.90 | 2.00 | 2.00 | 1.94 |      |      |      |  |
|                               | 28      | 2.00 | 2.00 | 2.00 | 2.00 | 2.00 | 2.00 | 2.00 | 2.00 | 1.51 | 2.00 | 2.00 | 2.00 | 2.00 | 2.00 | 2.00 | 2.00 | 2.00 | 2.00 | 1.58 | 2.00 | 2.00 | 2.00 |      |      |  |
|                               | 29      | 2.00 | 2.00 | 1.99 | 2.00 | 1.43 | 1.72 | 1.69 | 2.00 | 2.00 | 1.87 | 1.63 | 2.00 | 2.00 | 2.00 | 2.00 | 2.00 | 2.00 | 2.00 | 2.00 | 2.00 | 2.00 | 2.00 | 2.00 |      |  |
|                               | 30      | 2.00 | 2.00 | 2.00 | 2.00 | 1.47 | 1.76 | 1.50 | 2.00 | 2.00 | 1.36 | 1.30 | 2.00 | 2.00 | 2.00 | 2.00 | 2.00 | 2.00 | 2.00 | 2.00 | 2.00 | 2.00 | 2.00 | 2.00 | 1.43 |  |
| *Average: 1.95, Minimum: 1.07 |         |      |      |      |      |      |      |      |      |      |      |      |      |      |      |      |      |      |      |      |      |      |      |      |      |  |
| Month                         | Class # | 1    | 2    | 3    | 4    | 5    | 6    | 7    | 8    | 9    | 16   | 17   | 18   | 19   | 20   | 21   | 22   | 23   | 24   | 25   | 26   | 27   | 28   | 29   |      |  |
| August                        | 2       | 1.96 |      |      |      |      |      |      |      |      |      |      |      |      |      |      |      |      |      |      |      |      |      |      |      |  |



[illegible]

**Table S3.** J-M distance values for the Restoration site (Site B) landcover classes using 10 band multispectral imagery acquired in June, July, and August 2021. See Table 5 for class numbers and descriptions.

| Month                         | Class # | 1    | 2    | 3    | 4    | 5    | 6    | 7    | 8    | 9    | 10   | 11   | 12   | 13   | 14   |
|-------------------------------|---------|------|------|------|------|------|------|------|------|------|------|------|------|------|------|
| June                          | 2       | 1.96 |      |      |      |      |      |      |      |      |      |      |      |      |      |
|                               | 3       | 2.00 | 1.99 |      |      |      |      |      |      |      |      |      |      |      |      |
|                               | 4       | 2.00 | 2.00 | 2.00 |      |      |      |      |      |      |      |      |      |      |      |
|                               | 5       | 2.00 | 2.00 | 2.00 | 2.00 |      |      |      |      |      |      |      |      |      |      |
|                               | 6       | 2.00 | 2.00 | 2.00 | 2.00 | 1.61 |      |      |      |      |      |      |      |      |      |
|                               | 7       | 2.00 | 2.00 | 2.00 | 2.00 | 1.92 | 1.92 |      |      |      |      |      |      |      |      |
|                               | 8       | 2.00 | 1.99 | 2.00 | 2.00 | 2.00 | 2.00 | 2.00 |      |      |      |      |      |      |      |
|                               | 9       | 1.99 | 1.99 | 1.99 | 2.00 | 1.97 | 1.98 | 2.00 | 2.00 |      |      |      |      |      |      |
|                               | 10      | 1.99 | 2.00 | 1.78 | 2.00 | 2.00 | 2.00 | 2.00 | 2.00 | 2.00 |      |      |      |      |      |
|                               | 11      | 2.00 | 2.00 | 1.98 | 1.99 | 2.00 | 2.00 | 2.00 | 2.00 | 2.00 | 1.99 |      |      |      |      |
|                               | 12      | 2.00 | 2.00 | 2.00 | 2.00 | 2.00 | 1.93 | 1.58 | 2.00 | 2.00 | 2.00 | 2.00 |      |      |      |
|                               | 13      | 1.99 | 2.00 | 2.00 | 2.00 | 1.97 | 1.80 | 1.91 | 2.00 | 1.96 | 2.00 | 2.00 | 1.99 |      |      |
|                               | 14      | 2.00 | 2.00 | 2.00 | 2.00 | 1.88 | 1.46 | 1.92 | 2.00 | 1.96 | 2.00 | 2.00 | 1.88 | 1.92 |      |
|                               | 15      | 2.00 | 2.00 | 2.00 | 2.00 | 2.00 | 1.99 | 1.94 | 2.00 | 2.00 | 2.00 | 2.00 | 1.77 | 2.00 | 1.98 |
| *Average: 1.94, Minimum: 1.15 |         |      |      |      |      |      |      |      |      |      |      |      |      |      |      |
| Month                         | Class # | 1    | 2    | 3    | 4    | 5    | 6    | 7    | 8    | 9    | 10   | 11   | 12   | 13   | 14   |
| July                          | 2       | 1.96 |      |      |      |      |      |      |      |      |      |      |      |      |      |
|                               | 3       | 2.00 | 1.96 |      |      |      |      |      |      |      |      |      |      |      |      |
|                               | 4       | 2.00 | 2.00 | 2.00 |      |      |      |      |      |      |      |      |      |      |      |
|                               | 5       | 2.00 | 2.00 | 2.00 | 2.00 |      |      |      |      |      |      |      |      |      |      |
|                               | 6       | 2.00 | 2.00 | 2.00 | 2.00 | 1.61 |      |      |      |      |      |      |      |      |      |
|                               | 7       | 2.00 | 2.00 | 2.00 | 2.00 | 2.00 | 1.92 |      |      |      |      |      |      |      |      |
|                               | 8       | 2.00 | 1.99 | 2.00 | 2.00 | 2.00 | 2.00 | 2.00 |      |      |      |      |      |      |      |
|                               | 9       | 1.99 | 1.99 | 1.99 | 2.00 | 1.97 | 1.98 | 2.00 | 2.00 |      |      |      |      |      |      |

|                               |                               |      |      |      |      |      |      |      |      |      |      |      |      |      |      |      |
|-------------------------------|-------------------------------|------|------|------|------|------|------|------|------|------|------|------|------|------|------|------|
|                               | 10                            | 1.99 | 2.00 | 1.78 | 2.00 | 2.00 | 2.00 | 2.00 | 2.00 | 2.00 | 2.00 |      |      |      |      |      |
|                               | 11                            | 2.00 | 2.00 | 1.98 | 1.99 | 2.00 | 2.00 | 2.00 | 2.00 | 2.00 | 2.00 | 1.99 |      |      |      |      |
|                               | 12                            | 2.00 | 2.00 | 2.00 | 2.00 | 2.00 | 1.93 | 1.58 | 2.00 | 2.00 | 2.00 | 2.00 | 2.00 |      |      |      |
|                               | 13                            | 2.00 | 2.00 | 2.00 | 2.00 | 1.96 | 1.80 | 1.91 | 2.00 | 1.96 | 2.00 | 2.00 | 2.00 | 1.99 |      |      |
|                               | 14                            | 2.00 | 2.00 | 2.00 | 2.00 | 1.88 | 1.46 | 1.92 | 2.00 | 1.96 | 2.00 | 2.00 | 2.00 | 1.88 | 1.92 |      |
|                               | 15                            | 2.00 | 2.00 | 2.00 | 2.00 | 2.00 | 1.99 | 1.94 | 2.00 | 2.00 | 2.00 | 2.00 | 2.00 | 1.77 | 2.00 | 1.98 |
| *Average: 1.97, Minimum: 1.46 |                               |      |      |      |      |      |      |      |      |      |      |      |      |      |      |      |
| Month                         | Class #                       | 1    | 2    | 3    | 4    | 5    | 6    | 7    | 8    | 9    | 10   | 11   | 12   | 13   | 14   |      |
| August                        | 2                             | 1.89 |      |      |      |      |      |      |      |      |      |      |      |      |      |      |
|                               | 3                             | 1.99 | 1.92 |      |      |      |      |      |      |      |      |      |      |      |      |      |
|                               | 4                             | 2.00 | 2.00 | 2.00 |      |      |      |      |      |      |      |      |      |      |      |      |
|                               | 5                             | 2.00 | 2.00 | 2.00 | 2.00 |      |      |      |      |      |      |      |      |      |      |      |
|                               | 6                             | 2.00 | 2.00 | 2.00 | 2.00 | 1.92 |      |      |      |      |      |      |      |      |      |      |
|                               | 7                             | 2.00 | 2.00 | 2.00 | 2.00 | 2.00 | 1.99 |      |      |      |      |      |      |      |      |      |
|                               | 8                             | 1.96 | 1.93 | 1.99 | 2.00 | 2.00 | 2.00 | 2.00 |      |      |      |      |      |      |      |      |
|                               | 9                             | 2.00 | 2.00 | 2.00 | 2.00 | 1.91 | 1.50 | 1.99 | 2.00 |      |      |      |      |      |      |      |
|                               | 10                            | 2.00 | 1.99 | 1.73 | 2.00 | 2.00 | 2.00 | 2.00 | 2.00 | 2.00 |      |      |      |      |      |      |
|                               | 11                            | 2.00 | 2.00 | 1.99 | 1.96 | 2.00 | 2.00 | 2.00 | 2.00 | 2.00 | 2.00 |      |      |      |      |      |
|                               | 12                            | 2.00 | 2.00 | 2.00 | 2.00 | 2.00 | 1.98 | 1.79 | 2.00 | 2.00 | 2.00 | 2.00 |      |      |      |      |
|                               | 13                            | 2.00 | 1.97 | 2.00 | 2.00 | 1.97 | 1.83 | 1.99 | 2.00 | 1.75 | 2.00 | 2.00 | 2.00 |      |      |      |
|                               | 14                            | 2.00 | 2.00 | 2.00 | 1.36 | 2.00 | 2.00 | 2.00 | 2.00 | 2.00 | 2.00 | 1.98 | 2.00 | 2.00 |      |      |
|                               | 15                            | 2.00 | 2.00 | 2.00 | 2.00 | 2.00 | 2.00 | 1.99 | 1.82 | 2.00 | 1.99 | 2.00 | 2.00 | 1.72 | 1.99 | 2.00 |
|                               | *Average: 1.97, Minimum: 1.37 |      |      |      |      |      |      |      |      |      |      |      |      |      |      |      |



**Table S4.** Confusion matrix (in pixels [PB] or objects [OB]) and associated out-of-bag or validation accuracies when applying the Random Forest classifier to all the input variables (raw reflectances, vegetation indices, and textural features) of the imagery acquired in Aulac Reference site(Site A) in June, July, and August 2021. UA = User's Accuracy (%), EC = Error of Commission (%), PA = Producer's Accuracy (%), EO = Error of Omission (%), AA = Average Accuracy (%), OA = Overall Accuracy (%), KC = Kappa Coefficient. Bold figures indicate well-classified pixels. See Table 5 for landcover class numbers and descriptions.

| Approach |                  | Out-of-bag training data |     |     |     |     |      |     |      |     |     |     |     |     |     |     |     |     |     |    |     |     |     |    |    |       |      |       |     |  |  |
|----------|------------------|--------------------------|-----|-----|-----|-----|------|-----|------|-----|-----|-----|-----|-----|-----|-----|-----|-----|-----|----|-----|-----|-----|----|----|-------|------|-------|-----|--|--|
|          | Class            | 1                        | 2   | 3   | 4   | 5   | 6    | 7   | 8    | 9   | 16  | 17  | 18  | 19  | 20  | 21  | 22  | 23  | 24  | 25 | 26  | 27  | 28  | 29 | 30 | Total | UA   | EC    |     |  |  |
| PB       | Classified image | 1                        | 996 | 0   | 0   | 0   | 0    | 0   | 0    | 0   | 0   | 0   | 0   | 0   | 0   | 0   | 0   | 0   | 0   | 0  | 0   | 0   | 0   | 0  | 0  | 0     | 996  | 100.0 | 0.0 |  |  |
|          |                  | 2                        | 0   | 375 | 0   | 0   | 0    | 0   | 0    | 0   | 0   | 0   | 0   | 0   | 0   | 0   | 0   | 0   | 0   | 0  | 0   | 0   | 0   | 0  | 0  | 0     | 375  | 100.0 | 0.0 |  |  |
|          |                  | 3                        | 0   | 0   | 225 | 0   | 0    | 0   | 0    | 0   | 0   | 0   | 0   | 0   | 0   | 0   | 0   | 0   | 0   | 0  | 0   | 0   | 0   | 0  | 0  | 0     | 225  | 100.0 | 0.0 |  |  |
|          |                  | 4                        | 0   | 0   | 0   | 736 | 0    | 0   | 0    | 0   | 0   | 0   | 0   | 0   | 0   | 0   | 0   | 0   | 0   | 0  | 0   | 0   | 0   | 0  | 0  | 0     | 736  | 100.0 | 0.0 |  |  |
|          |                  | 5                        | 0   | 0   | 0   | 0   | 1472 | 0   | 0    | 0   | 0   | 0   | 0   | 0   | 0   | 0   | 0   | 0   | 0   | 0  | 0   | 0   | 0   | 0  | 0  | 0     | 1472 | 100.0 | 0.0 |  |  |
|          |                  | 6                        | 0   | 0   | 0   | 0   | 0    | 745 | 0    | 0   | 0   | 0   | 0   | 0   | 0   | 0   | 0   | 0   | 0   | 0  | 0   | 0   | 0   | 0  | 0  | 0     | 745  | 100.0 | 0.0 |  |  |
|          |                  | 7                        | 0   | 0   | 0   | 0   | 0    | 0   | 1500 | 0   | 0   | 0   | 0   | 0   | 0   | 0   | 0   | 0   | 0   | 0  | 0   | 0   | 0   | 0  | 0  | 0     | 1500 | 100.0 | 0.0 |  |  |
|          |                  | 8                        | 0   | 0   | 0   | 0   | 0    | 0   | 0    | 495 | 0   | 0   | 0   | 0   | 0   | 0   | 0   | 0   | 0   | 0  | 0   | 0   | 0   | 0  | 0  | 0     | 495  | 100.0 | 0.0 |  |  |
|          |                  | 9                        | 0   | 0   | 0   | 0   | 0    | 0   | 0    | 0   | 407 | 0   | 0   | 0   | 0   | 0   | 0   | 0   | 0   | 0  | 0   | 0   | 0   | 0  | 0  | 0     | 407  | 100.0 | 0.0 |  |  |
|          |                  | 16                       | 0   | 0   | 0   | 0   | 0    | 0   | 0    | 0   | 0   | 723 | 0   | 0   | 0   | 0   | 0   | 0   | 0   | 0  | 0   | 0   | 0   | 0  | 0  | 0     | 723  | 100.0 | 0.0 |  |  |
|          |                  | 17                       | 0   | 0   | 0   | 0   | 0    | 0   | 0    | 0   | 0   | 0   | 661 | 0   | 0   | 0   | 0   | 0   | 0   | 0  | 0   | 0   | 0   | 0  | 0  | 0     | 661  | 100.0 | 0.0 |  |  |
|          |                  | 18                       | 0   | 0   | 0   | 0   | 0    | 0   | 0    | 0   | 0   | 0   | 0   | 489 | 0   | 0   | 0   | 0   | 0   | 0  | 0   | 0   | 0   | 0  | 0  | 0     | 489  | 100.0 | 0.0 |  |  |
|          |                  | 19                       | 0   | 0   | 0   | 0   | 0    | 0   | 0    | 0   | 0   | 0   | 0   | 0   | 366 | 0   | 0   | 0   | 0   | 0  | 0   | 0   | 0   | 0  | 0  | 0     | 366  | 100.0 | 0.0 |  |  |
|          |                  | 20                       | 0   | 0   | 0   | 0   | 0    | 0   | 0    | 0   | 0   | 0   | 0   | 0   | 0   | 375 | 0   | 0   | 0   | 0  | 0   | 0   | 0   | 0  | 0  | 0     | 375  | 100.0 | 0.0 |  |  |
|          |                  | 21                       | 0   | 0   | 0   | 0   | 0    | 0   | 0    | 0   | 0   | 0   | 0   | 0   | 0   | 0   | 381 | 0   | 0   | 0  | 0   | 0   | 0   | 0  | 0  | 0     | 381  | 100.0 | 0.0 |  |  |
|          |                  | 22                       | 0   | 0   | 0   | 0   | 0    | 0   | 0    | 0   | 0   | 0   | 0   | 0   | 0   | 0   | 400 | 0   | 0   | 0  | 0   | 0   | 0   | 0  | 0  | 0     | 400  | 100.0 | 0.0 |  |  |
|          |                  | 23                       | 0   | 0   | 0   | 0   | 0    | 0   | 0    | 0   | 0   | 0   | 0   | 0   | 0   | 0   | 0   | 375 | 0   | 0  | 0   | 0   | 0   | 0  | 0  | 0     | 375  | 100.0 | 0.0 |  |  |
|          |                  | 24                       | 0   | 0   | 0   | 0   | 0    | 0   | 0    | 0   | 0   | 0   | 0   | 0   | 0   | 0   | 0   | 0   | 275 | 0  | 0   | 0   | 0   | 0  | 0  | 0     | 275  | 100.0 | 0.0 |  |  |
|          |                  | 25                       | 0   | 0   | 0   | 0   | 0    | 0   | 0    | 0   | 0   | 0   | 0   | 0   | 0   | 0   | 0   | 0   | 0   | 0  | 152 | 0   | 0   | 0  | 0  | 0     | 152  | 100.0 | 0.0 |  |  |
|          |                  | 26                       | 0   | 0   | 0   | 0   | 0    | 0   | 0    | 0   | 0   | 0   | 0   | 0   | 0   | 0   | 0   | 0   | 0   | 0  | 0   | 260 | 0   | 0  | 0  | 0     | 260  | 100.0 | 0.0 |  |  |
|          |                  | 27                       | 0   | 0   | 0   | 0   | 0    | 0   | 0    | 0   | 0   | 0   | 0   | 0   | 0   | 0   | 0   | 0   | 0   | 0  | 0   | 0   | 250 | 0  | 0  | 0     | 250  | 100.0 | 0.0 |  |  |

|          |    |                          |       |       |       |       |       |       |       |       |       |       |       |       |       |       |       |       |       |       |       |       |       |       |       |       |       |       |       |
|----------|----|--------------------------|-------|-------|-------|-------|-------|-------|-------|-------|-------|-------|-------|-------|-------|-------|-------|-------|-------|-------|-------|-------|-------|-------|-------|-------|-------|-------|-------|
|          |    | 28                       | 0     | 0     | 0     | 0     | 0     | 0     | 0     | 0     | 0     | 0     | 0     | 0     | 0     | 0     | 0     | 0     | 0     | 0     | 0     | 0     | 0     | 250   | 0     | 0     | 250   | 100.0 | 0.0   |
|          |    | 29                       | 0     | 0     | 0     | 0     | 0     | 0     | 0     | 0     | 0     | 0     | 0     | 0     | 0     | 0     | 0     | 0     | 0     | 0     | 0     | 0     | 0     | 0     | 407   | 0     | 407   | 100.0 | 0.0   |
|          |    | 30                       | 0     | 0     | 0     | 0     | 0     | 0     | 0     | 0     | 0     | 0     | 0     | 0     | 0     | 0     | 0     | 0     | 0     | 0     | 0     | 0     | 0     | 0     | 0     | 1246  | 1246  | 100.0 | 0.0   |
|          |    | Total                    | 996   | 375   | 225   | 736   | 1472  | 745   | 1500  | 495   | 407   | 723   | 661   | 489   | 366   | 375   | 381   | 400   | 375   | 275   | 152   | 260   | 250   | 250   | 407   | 1246  | 13386 | AA    | 100.0 |
|          |    | PA                       | 100.0 | 100.0 | 100.0 | 100.0 | 100.0 | 100.0 | 100.0 | 100.0 | 100.0 | 100.0 | 100.0 | 100.0 | 100.0 | 100.0 | 100.0 | 100.0 | 100.0 | 100.0 | 100.0 | 100.0 | 100.0 | 100.0 | 100.0 | 100.0 |       | OA    | 100.0 |
|          |    | EO                       | 0.0   | 0.0   | 0.0   | 0.0   | 0.0   | 0.0   | 0.0   | 0.0   | 0.0   | 0.0   | 0.0   | 0.0   | 0.0   | 0.0   | 0.0   | 0.0   | 0.0   | 0.0   | 0.0   | 0.0   | 0.0   | 0.0   | 0.0   | 0.0   |       | Kappa | 100.0 |
| Approach |    | Out-of-bag training data |       |       |       |       |       |       |       |       |       |       |       |       |       |       |       |       |       |       |       |       |       |       |       |       |       |       |       |
|          | OB | Class                    | 1     | 2     | 3     | 4     | 5     | 6     | 7     | 8     | 9     | 16    | 17    | 18    | 19    | 20    | 21    | 22    | 23    | 24    | 25    | 26    | 27    | 28    | 29    | 30    | Total | UA    | EC    |
| 1        |    | 40                       | 0     | 0     | 0     | 0     | 0     | 0     | 0     | 0     | 0     | 0     | 0     | 0     | 0     | 0     | 0     | 0     | 0     | 0     | 0     | 0     | 0     | 0     | 0     | 40    | 100.0 | 0.0   |       |
| 2        |    | 0                        | 15    | 0     | 0     | 0     | 0     | 0     | 0     | 0     | 0     | 0     | 0     | 0     | 0     | 0     | 0     | 0     | 0     | 0     | 0     | 0     | 0     | 0     | 0     | 15    | 100.0 | 0.0   |       |
| 3        |    | 0                        | 0     | 10    | 0     | 0     | 0     | 0     | 0     | 0     | 0     | 0     | 0     | 0     | 0     | 0     | 0     | 0     | 0     | 0     | 0     | 0     | 0     | 0     | 0     | 10    | 100.0 | 0.0   |       |
| 4        |    | 0                        | 0     | 0     | 30    | 0     | 0     | 0     | 0     | 0     | 0     | 0     | 0     | 0     | 0     | 0     | 0     | 0     | 0     | 0     | 0     | 0     | 0     | 0     | 0     | 30    | 100.0 | 0.0   |       |
| 5        |    | 0                        | 0     | 0     | 0     | 59    | 0     | 0     | 0     | 0     | 0     | 0     | 0     | 0     | 0     | 0     | 0     | 0     | 0     | 0     | 0     | 0     | 0     | 0     | 0     | 59    | 100.0 | 0.0   |       |
| 6        |    | 0                        | 0     | 0     | 0     | 0     | 30    | 0     | 0     | 0     | 0     | 0     | 0     | 0     | 0     | 0     | 0     | 0     | 0     | 0     | 0     | 0     | 0     | 0     | 0     | 30    | 100.0 | 0.0   |       |
| 7        |    | 0                        | 0     | 0     | 0     | 0     | 0     | 60    | 0     | 0     | 0     | 0     | 0     | 0     | 0     | 0     | 0     | 0     | 0     | 0     | 0     | 0     | 0     | 0     | 0     | 60    | 100.0 | 0.0   |       |
| 8        |    | 0                        | 0     | 0     | 0     | 0     | 0     | 0     | 20    | 0     | 0     | 0     | 0     | 0     | 0     | 0     | 0     | 0     | 0     | 0     | 0     | 0     | 0     | 0     | 0     | 20    | 100.0 | 0.0   |       |
| 9        |    | 0                        | 0     | 0     | 0     | 0     | 0     | 0     | 0     | 10    | 0     | 0     | 0     | 0     | 0     | 0     | 0     | 0     | 0     | 0     | 0     | 0     | 0     | 0     | 0     | 10    | 100.0 | 0.0   |       |
| 16       |    | 0                        | 0     | 0     | 0     | 0     | 0     | 0     | 0     | 0     | 30    | 0     | 0     | 0     | 0     | 0     | 0     | 0     | 0     | 0     | 0     | 0     | 0     | 0     | 0     | 30    | 100.0 | 0.0   |       |
| 17       |    | 0                        | 0     | 0     | 0     | 0     | 0     | 0     | 0     | 0     | 0     | 30    | 0     | 0     | 0     | 0     | 0     | 0     | 0     | 0     | 0     | 0     | 0     | 0     | 0     | 30    | 100.0 | 0.0   |       |
| 18       |    | 0                        | 0     | 0     | 0     | 0     | 0     | 0     | 0     | 0     | 0     | 0     | 21    | 0     | 0     | 0     | 0     | 0     | 0     | 0     | 0     | 0     | 0     | 0     | 0     | 21    | 100.0 | 0.0   |       |
| 19       |    | 0                        | 0     | 0     | 0     | 0     | 0     | 0     | 0     | 0     | 0     | 0     | 0     | 15    | 0     | 0     | 0     | 0     | 0     | 0     | 0     | 0     | 0     | 0     | 0     | 15    | 100.0 | 0.0   |       |
| 20       |    | 0                        | 0     | 0     | 0     | 0     | 0     | 0     | 0     | 0     | 0     | 0     | 0     | 0     | 15    | 0     | 0     | 0     | 0     | 0     | 0     | 0     | 0     | 0     | 0     | 15    | 100.0 | 0.0   |       |
| 21       |    | 0                        | 0     | 0     | 0     | 0     | 0     | 0     | 0     | 0     | 0     | 0     | 0     | 0     | 0     | 15    | 0     | 0     | 0     | 0     | 0     | 0     | 0     | 0     | 0     | 15    | 100.0 | 0.0   |       |
| 22       |    | 0                        | 0     | 0     | 0     | 0     | 0     | 0     | 0     | 0     | 0     | 0     | 0     | 0     | 0     | 0     | 16    | 0     | 0     | 0     | 0     | 0     | 0     | 0     | 0     | 16    | 100.0 | 0.0   |       |
| 23       |    | 0                        | 0     | 0     | 0     | 0     | 0     | 0     | 0     | 0     | 0     | 0     | 0     | 0     | 0     | 0     | 0     | 15    | 0     | 0     | 0     | 0     | 0     | 0     | 0     | 15    | 100.0 | 0.0   |       |
| 24       |    | 0                        | 0     | 0     | 0     | 0     | 0     | 0     | 0     | 0     | 0     | 0     | 0     | 0     | 0     | 0     | 0     | 0     | 0     | 11    | 0     | 0     | 0     | 0     | 0     | 11    | 100.0 | 0.0   |       |
| 25       |    | 0                        | 0     | 0     | 0     | 0     | 0     | 0     | 0     | 0     | 0     | 0     | 0     | 0     | 0     | 0     | 0     | 0     | 0     | 0     | 5     | 0     | 0     | 0     | 0     | 0     | 5     | 100.0 | 0.0   |

|          |                  |                 |       |       |       |       |      |       |       |       |       |       |       |       |       |       |       |       |       |       |       |       |       |       |       |     |       |       |       |  |
|----------|------------------|-----------------|-------|-------|-------|-------|------|-------|-------|-------|-------|-------|-------|-------|-------|-------|-------|-------|-------|-------|-------|-------|-------|-------|-------|-----|-------|-------|-------|--|
|          |                  | 26              | 0     | 0     | 0     | 0     | 0    | 0     | 0     | 0     | 0     | 0     | 0     | 0     | 0     | 0     | 0     | 0     | 0     | 0     | 0     | 10    | 0     | 0     | 0     | 0   | 10    | 100.0 | 0.0   |  |
|          |                  | 27              | 0     | 0     | 0     | 0     | 0    | 0     | 0     | 0     | 0     | 0     | 0     | 0     | 0     | 0     | 0     | 0     | 0     | 0     | 0     | 0     | 10    | 0     | 0     | 0   | 10    | 100.0 | 0.0   |  |
|          |                  | 28              | 0     | 0     | 0     | 0     | 0    | 0     | 0     | 0     | 0     | 0     | 0     | 0     | 0     | 0     | 0     | 0     | 0     | 0     | 0     | 0     | 0     | 10    | 0     | 0   | 10    | 100.0 | 0.0   |  |
|          |                  | 29              | 0     | 0     | 0     | 0     | 0    | 0     | 0     | 0     | 0     | 0     | 0     | 0     | 0     | 0     | 0     | 0     | 0     | 0     | 0     | 0     | 0     | 0     | 18    | 0   | 18    | 100.0 | 0.0   |  |
|          |                  | 30              | 0     | 0     | 0     | 0     | 1    | 0     | 0     | 0     | 0     | 0     | 0     | 0     | 0     | 0     | 0     | 0     | 0     | 0     | 0     | 0     | 0     | 0     | 0     | 52  | 53    | 98.1  | 1.9   |  |
|          |                  | Total           | 40    | 15    | 10    | 30    | 60   | 30    | 60    | 20    | 10    | 30    | 30    | 21    | 15    | 15    | 15    | 16    | 15    | 11    | 5     | 10    | 10    | 10    | 18    | 52  | 548   | AA    | 100.0 |  |
|          |                  | PA              | 100.0 | 100.0 | 100.0 | 100.0 | 98.3 | 100.0 | 100.0 | 100.0 | 100.0 | 100.0 | 100.0 | 100.0 | 100.0 | 100.0 | 100.0 | 100.0 | 100.0 | 100.0 | 100.0 | 100.0 | 100.0 | 100.0 | 100.0 |     | OA    | 100.0 |       |  |
|          |                  | EO              | 0.0   | 0.0   | 0.0   | 0.0   | 1.7  | 0.0   | 0.0   | 0.0   | 0.0   | 0.0   | 0.0   | 0.0   | 0.0   | 0.0   | 0.0   | 0.0   | 0.0   | 0.0   | 0.0   | 0.0   | 0.0   | 0.0   | 0.0   | 0.0 |       | Kappa | 100.0 |  |
| Approach |                  | Validation data |       |       |       |       |      |       |       |       |       |       |       |       |       |       |       |       |       |       |       |       |       |       |       |     |       |       |       |  |
| PB       | Classified image | Class           | 1     | 2     | 3     | 4     | 5    | 6     | 7     | 8     | 9     | 16    | 17    | 18    | 19    | 20    | 21    | 22    | 23    | 24    | 25    | 26    | 27    | 28    | 29    | 30  | Total | UA    | EC    |  |
|          |                  | 1               | 39    | 0     | 0     | 1     | 0    | 0     | 0     | 0     | 0     | 0     | 0     | 0     | 1     | 2     | 0     | 2     | 0     | 0     | 0     | 0     | 0     | 0     | 0     | 0   | 45    | 86.7  | 13.3  |  |
|          |                  | 2               | 1     | 13    | 2     | 0     | 1    | 0     | 0     | 0     | 0     | 0     | 0     | 0     | 0     | 0     | 0     | 0     | 0     | 0     | 0     | 0     | 0     | 0     | 0     | 0   | 17    | 100.0 | 0.0   |  |
|          |                  | 3               | 0     | 2     | 8     | 0     | 0    | 0     | 0     | 0     | 0     | 0     | 0     | 0     | 0     | 0     | 0     | 0     | 0     | 0     | 0     | 0     | 0     | 0     | 0     | 0   | 10    | 80.0  | 20.0  |  |
|          |                  | 4               | 0     | 0     | 0     | 29    | 0    | 0     | 0     | 0     | 0     | 0     | 0     | 0     | 0     | 0     | 0     | 0     | 0     | 0     | 0     | 0     | 0     | 0     | 0     | 0   | 29    | 100.0 | 0.0   |  |
|          |                  | 5               | 0     | 0     | 0     | 0     | 56   | 0     | 0     | 0     | 0     | 0     | 0     | 0     | 0     | 0     | 0     | 0     | 0     | 0     | 0     | 0     | 0     | 0     | 0     | 1   | 57    | 98.2  | 1.8   |  |
|          |                  | 6               | 0     | 0     | 0     | 0     | 0    | 28    | 2     | 0     | 0     | 0     | 0     | 0     | 0     | 0     | 0     | 0     | 0     | 0     | 0     | 0     | 0     | 0     | 0     | 2   | 32    | 87.5  | 12.5  |  |
|          |                  | 7               | 0     | 0     | 0     | 0     | 0    | 1     | 55    | 0     | 0     | 0     | 3     | 0     | 0     | 0     | 0     | 0     | 0     | 0     | 0     | 0     | 0     | 0     | 0     | 0   | 59    | 93.2  | 6.8   |  |
|          |                  | 8               | 0     | 0     | 0     | 0     | 0    | 0     | 0     | 20    | 0     | 0     | 0     | 0     | 0     | 0     | 0     | 0     | 0     | 0     | 0     | 0     | 0     | 0     | 0     | 0   | 20    | 100.0 | 0.0   |  |
|          |                  | 9               | 0     | 0     | 0     | 0     | 0    | 0     | 0     | 0     | 9     | 0     | 0     | 0     | 0     | 0     | 0     | 0     | 0     | 0     | 0     | 0     | 0     | 0     | 0     | 0   | 9     | 100.0 | 0.0   |  |
|          |                  | 16              | 0     | 0     | 0     | 0     | 3    | 0     | 0     | 0     | 0     | 28    | 1     | 0     | 0     | 0     | 0     | 0     | 0     | 0     | 0     | 0     | 0     | 0     | 0     | 5   | 37    | 75.7  | 24.3  |  |
|          |                  | 17              | 0     | 0     | 0     | 0     | 0    | 0     | 1     | 0     | 0     | 0     | 25    | 0     | 0     | 0     | 0     | 0     | 0     | 0     | 0     | 0     | 0     | 0     | 0     | 0   | 26    | 96.2  | 3.8   |  |
|          |                  | 18              | 0     | 0     | 0     | 0     | 0    | 0     | 0     | 0     | 0     | 0     | 0     | 19    | 0     | 0     | 1     | 0     | 0     | 0     | 0     | 0     | 0     | 0     | 0     | 0   | 20    | 95.0  | 5.0   |  |
|          |                  | 19              | 0     | 0     | 0     | 0     | 0    | 0     | 0     | 0     | 0     | 0     | 0     | 0     | 14    | 0     | 0     | 0     | 0     | 0     | 0     | 0     | 0     | 0     | 0     | 0   | 14    | 100.0 | 0.0   |  |
|          |                  | 20              | 0     | 0     | 0     | 0     | 0    | 0     | 0     | 0     | 0     | 0     | 0     | 0     | 0     | 13    | 0     | 0     | 0     | 0     | 0     | 0     | 0     | 0     | 0     | 0   | 13    | 100.0 | 0.0   |  |
|          |                  | 21              | 0     | 0     | 0     | 0     | 0    | 0     | 0     | 0     | 0     | 0     | 0     | 0     | 0     | 0     | 14    | 0     | 0     | 0     | 0     | 1     | 0     | 0     | 0     | 0   | 15    | 93.3  | 6.7   |  |
|          |                  | 22              | 0     | 0     | 0     | 0     | 0    | 0     | 0     | 0     | 0     | 0     | 0     | 1     | 0     | 0     | 0     | 13    | 0     | 0     | 0     | 0     | 0     | 0     | 0     | 0   | 14    | 92.9  | 7.1   |  |
|          |                  | 23              | 0     | 0     | 0     | 0     | 0    | 0     | 0     | 0     | 0     | 0     | 0     | 0     | 0     | 0     | 0     | 0     | 15    | 0     | 0     | 0     | 0     | 0     | 0     | 0   | 15    | 100.0 | 0.0   |  |



|          |                  |                 |      |      |      |      |      |      |      |       |       |      |      |       |      |      |      |      |      |       |       |       |      |      |       |       |     |       |      |
|----------|------------------|-----------------|------|------|------|------|------|------|------|-------|-------|------|------|-------|------|------|------|------|------|-------|-------|-------|------|------|-------|-------|-----|-------|------|
|          |                  | 24              | 0    | 0    | 0    | 0    | 0    | 0    | 0    | 0     | 0     | 0    | 0    | 0     | 0    | 0    | 0    | 0    | 0    | 10    | 0     | 0     | 0    | 0    | 0     | 0     | 10  | 100.0 | 0.0  |
|          |                  | 25              | 0    | 0    | 0    | 0    | 0    | 0    | 0    | 0     | 0     | 0    | 0    | 0     | 0    | 0    | 0    | 0    | 0    | 0     | 5     | 0     | 0    | 0    | 0     | 0     | 5   | 100.0 | 0.0  |
|          |                  | 26              | 0    | 0    | 0    | 0    | 0    | 0    | 0    | 0     | 0     | 0    | 0    | 0     | 0    | 0    | 0    | 0    | 0    | 0     | 0     | 9     | 0    | 0    | 0     | 0     | 9   | 100.0 | 0.0  |
|          |                  | 27              | 0    | 0    | 0    | 0    | 0    | 0    | 0    | 0     | 0     | 0    | 0    | 0     | 0    | 0    | 0    | 0    | 0    | 0     | 0     | 0     | 9    | 0    | 0     | 0     | 9   | 100.0 | 0.0  |
|          |                  | 28              | 0    | 0    | 0    | 0    | 0    | 0    | 0    | 0     | 0     | 0    | 0    | 0     | 0    | 0    | 0    | 0    | 0    | 0     | 0     | 0     | 1    | 9    | 0     | 0     | 10  | 90.0  | 10.0 |
|          |                  | 29              | 0    | 0    | 0    | 0    | 0    | 0    | 1    | 0     | 0     | 0    | 0    | 0     | 0    | 0    | 0    | 0    | 0    | 0     | 0     | 0     | 0    | 0    | 15    | 0     | 16  | 93.8  | 6.3  |
|          |                  | 30              | 0    | 0    | 0    | 0    | 0    | 1    | 1    | 0     | 0     | 2    | 1    | 0     | 0    | 0    | 0    | 0    | 0    | 0     | 0     | 0     | 0    | 0    | 0     | 42    | 47  | 89.4  | 10.6 |
|          |                  | Total           | 40   | 15   | 10   | 30   | 60   | 30   | 60   | 20    | 9     | 30   | 30   | 20    | 20   | 15   | 15   | 15   | 15   | 15    | 10    | 5     | 10   | 10   | 15    | 50    | 538 | AA    | 93.9 |
|          |                  | PA              | 97.5 | 86.7 | 80.0 | 96.7 | 93.3 | 93.3 | 91.7 | 100.0 | 100.0 | 93.3 | 83.3 | 100.0 | 95.0 | 93.3 | 86.7 | 93.3 | 86.7 | 100.0 | 100.0 | 100.0 | 90.0 | 90.0 | 100.0 | 84.0  |     | OA    | 92.4 |
|          |                  | EO              | 2.5  | 13.3 | 20.0 | 3.3  | 6.7  | 6.7  | 8.3  | 0.0   | 0.0   | 6.7  | 16.7 | 0.0   | 5.0  | 6.7  | 13.3 | 6.7  | 13.3 | 0.0   | 0.0   | 0.0   | 10.0 | 10.0 | 0.0   | 16.0  |     | Kappa | 91.9 |
| Approach |                  | Validation data |      |      |      |      |      |      |      |       |       |      |      |       |      |      |      |      |      |       |       |       |      |      |       |       |     |       |      |
|          | Class            | 1               | 2    | 3    | 4    | 5    | 6    | 7    | 8    | 9     | 16    | 17   | 18   | 19    | 20   | 21   | 22   | 23   | 24   | 25    | 26    | 27    | 28   | 29   | 30    | Total | UA  | EC    |      |
| OB       | Classified image | 1               | 37   | 0    | 0    | 1    | 0    | 0    | 0    | 0     | 0     | 0    | 1    | 0     | 1    | 3    | 0    | 0    | 0    | 0     | 0     | 0     | 0    | 0    | 0     | 0     | 42  | 88.1  | 11.9 |
|          |                  | 2               | 1    | 12   | 1    | 0    | 1    | 0    | 0    | 0     | 0     | 0    | 0    | 0     | 0    | 0    | 0    | 0    | 0    | 0     | 0     | 0     | 0    | 0    | 0     | 0     | 15  | 100.0 | 0.0  |
|          |                  | 3               | 0    | 3    | 9    | 0    | 0    | 0    | 0    | 0     | 0     | 0    | 0    | 0     | 0    | 0    | 0    | 0    | 0    | 0     | 0     | 0     | 0    | 0    | 0     | 0     | 12  | 75.0  | 25.0 |
|          |                  | 4               | 0    | 0    | 0    | 29   | 0    | 0    | 0    | 0     | 0     | 0    | 0    | 0     | 0    | 0    | 0    | 0    | 0    | 0     | 0     | 0     | 0    | 0    | 1     | 0     | 30  | 96.7  | 3.3  |
|          |                  | 5               | 0    | 0    | 0    | 0    | 57   | 0    | 0    | 0     | 1     | 0    | 0    | 0     | 0    | 0    | 0    | 0    | 0    | 0     | 0     | 0     | 0    | 0    | 0     | 1     | 59  | 96.6  | 3.4  |
|          |                  | 6               | 0    | 0    | 0    | 0    | 0    | 28   | 4    | 0     | 0     | 0    | 1    | 0     | 0    | 0    | 0    | 0    | 0    | 0     | 0     | 0     | 0    | 0    | 0     | 2     | 35  | 80.0  | 20.0 |
|          |                  | 7               | 0    | 0    | 0    | 0    | 0    | 0    | 53   | 0     | 0     | 0    | 3    | 0     | 0    | 0    | 0    | 0    | 0    | 0     | 0     | 0     | 0    | 0    | 0     | 0     | 56  | 94.6  | 5.4  |
|          |                  | 8               | 0    | 0    | 0    | 0    | 0    | 0    | 0    | 20    | 0     | 0    | 0    | 0     | 0    | 0    | 0    | 0    | 0    | 0     | 0     | 0     | 0    | 0    | 0     | 0     | 20  | 100.0 | 0.0  |
|          |                  | 9               | 0    | 0    | 0    | 0    | 0    | 0    | 0    | 0     | 9     | 0    | 0    | 0     | 0    | 0    | 0    | 0    | 0    | 0     | 0     | 0     | 0    | 0    | 0     | 0     | 9   | 100.0 | 0.0  |
|          |                  | 16              | 0    | 0    | 0    | 0    | 0    | 0    | 0    | 0     | 0     | 26   | 0    | 0     | 0    | 0    | 0    | 0    | 0    | 0     | 0     | 0     | 0    | 0    | 0     | 3     | 31  | 83.9  | 16.1 |
|          |                  | 17              | 0    | 0    | 0    | 0    | 0    | 0    | 0    | 0     | 0     | 0    | 24   | 0     | 0    | 0    | 0    | 0    | 0    | 0     | 0     | 0     | 0    | 0    | 0     | 0     | 26  | 92.3  | 7.7  |
|          |                  | 18              | 0    | 0    | 0    | 0    | 0    | 0    | 0    | 0     | 0     | 0    | 0    | 19    | 0    | 0    | 1    | 0    | 0    | 0     | 0     | 0     | 0    | 0    | 0     | 0     | 20  | 95.0  | 5.0  |
|          |                  | 19              | 0    | 0    | 0    | 0    | 0    | 0    | 0    | 0     | 0     | 0    | 0    | 0     | 14   | 0    | 0    | 0    | 0    | 0     | 0     | 0     | 0    | 0    | 0     | 0     | 14  | 100.0 | 0.0  |
|          |                  | 20              | 2    | 0    | 0    | 0    | 0    | 0    | 0    | 0     | 0     | 0    | 0    | 0     | 0    | 12   | 0    | 0    | 0    | 0     | 0     | 0     | 0    | 0    | 0     | 0     | 14  | 85.7  | 14.3 |
| 21       | 0                | 0               | 0    | 0    | 0    | 0    | 0    | 0    | 0    | 0     | 0     | 0    | 0    | 0     | 13   | 0    | 0    | 0    | 0    | 1     | 0     | 0     | 0    | 0    | 14    | 92.9  | 7.1 |       |      |

|  |  |       |      |      |      |      |      |      |      |       |      |      |      |      |      |      |      |      |       |       |       |      |      |       |      |      |     |       |      |
|--|--|-------|------|------|------|------|------|------|------|-------|------|------|------|------|------|------|------|------|-------|-------|-------|------|------|-------|------|------|-----|-------|------|
|  |  | 22    | 0    | 0    | 0    | 0    | 0    | 0    | 0    | 0     | 0    | 0    | 0    | 1    | 0    | 0    | 0    | 14   | 0     | 0     | 0     | 0    | 0    | 0     | 0    | 0    | 15  | 93.3  | 6.7  |
|  |  | 23    | 0    | 0    | 0    | 0    | 0    | 0    | 0    | 0     | 0    | 0    | 0    | 0    | 0    | 0    | 1    | 0    | 15    | 0     | 0     | 0    | 0    | 0     | 0    | 0    | 16  | 93.8  | 6.3  |
|  |  | 24    | 0    | 0    | 0    | 0    | 0    | 0    | 0    | 0     | 0    | 0    | 0    | 0    | 0    | 0    | 0    | 1    | 0     | 10    | 0     | 0    | 0    | 0     | 0    | 0    | 11  | 90.9  | 9.1  |
|  |  | 25    | 0    | 0    | 0    | 0    | 0    | 0    | 0    | 0     | 0    | 0    | 0    | 0    | 0    | 0    | 0    | 0    | 0     | 0     | 5     | 0    | 0    | 0     | 0    | 0    | 5   | 100.0 | 0.0  |
|  |  | 26    | 0    | 0    | 0    | 0    | 0    | 0    | 0    | 0     | 0    | 0    | 0    | 0    | 0    | 0    | 0    | 0    | 0     | 0     | 0     | 9    | 0    | 0     | 0    | 0    | 9   | 100.0 | 0.0  |
|  |  | 27    | 0    | 0    | 0    | 0    | 0    | 0    | 0    | 0     | 0    | 0    | 0    | 0    | 0    | 0    | 0    | 0    | 0     | 0     | 0     | 0    | 9    | 0     | 0    | 0    | 9   | 100.0 | 0.0  |
|  |  | 28    | 0    | 0    | 0    | 0    | 0    | 0    | 0    | 0     | 0    | 0    | 0    | 0    | 0    | 0    | 0    | 0    | 0     | 0     | 0     | 0    | 1    | 10    | 0    | 0    | 11  | 90.9  | 9.1  |
|  |  | 29    | 0    | 0    | 0    | 0    | 0    | 0    | 0    | 0     | 0    | 0    | 0    | 0    | 0    | 0    | 0    | 0    | 0     | 0     | 0     | 0    | 0    | 0     | 14   | 0    | 14  | 100.0 | 0.0  |
|  |  | 30    | 0    | 0    | 0    | 0    | 0    | 1    | 2    | 0     | 0    | 4    | 2    | 0    | 0    | 0    | 0    | 0    | 0     | 0     | 0     | 0    | 0    | 0     | 0    | 44   | 53  | 83.0  | 17.0 |
|  |  | Total | 40   | 15   | 10   | 30   | 60   | 30   | 60   | 20    | 10   | 30   | 30   | 20   | 15   | 15   | 15   | 15   | 15    | 10    | 5     | 10   | 10   | 10    | 15   | 50   | 540 | AA    | 92.4 |
|  |  | PA    | 92.5 | 80.0 | 90.0 | 96.7 | 95.0 | 93.3 | 88.3 | 100.0 | 90.0 | 86.7 | 80.0 | 95.0 | 93.3 | 80.0 | 86.7 | 93.3 | 100.0 | 100.0 | 100.0 | 90.0 | 90.0 | 100.0 | 93.3 | 88.0 |     | OA    | 91.1 |
|  |  | EO    | 7.5  | 20.0 | 10.0 | 3.3  | 5.0  | 6.7  | 11.7 | 0.0   | 10.0 | 13.3 | 20.0 | 5.0  | 6.7  | 20.0 | 13.3 | 6.7  | 0.0   | 0.0   | 0.0   | 10.0 | 10.0 | 0.0   | 6.7  | 12.0 |     | Kappa | 91.9 |

**Table S5.** Confusion matrix (in pixels [PB] or objects [OB]) and associated out-of-bag or validation accuracies when applying the Random Forest classifier to all the input variables (raw reflectances, vegetation indices, textural features) of the imagery acquired in Aulac Restoration site (Site B) in June, July, and August 2021. UA = User's Accuracy (%), EC = Error of Commission (%), PA = Producer's Accuracy (%), EO = Error of Omission (%), AA = Average Accuracy (%), OA = Overall Accuracy (%), KC = Kappa Coefficient. Bold figures indicate well-classified pixels. See Table 5 for landcover class numbers and descriptions.

| Approach | Out-of-bag training data |       |       |      |       |      |       |       |       |       |       |      |       |       |       |       |       |       |      |       |     |
|----------|--------------------------|-------|-------|------|-------|------|-------|-------|-------|-------|-------|------|-------|-------|-------|-------|-------|-------|------|-------|-----|
| PB       | Classified image         | Class | 1     | 2    | 3     | 4    | 5     | 6     | 7     | 8     | 9     | 10   | 11    | 12    | 13    | 14    | 15    | Total | UA   | EC    |     |
|          |                          | 1     | 752   | 1    | 0     | 0    | 0     | 0     | 0     | 0     | 0     | 0    | 0     | 0     | 0     | 0     | 0     | 0     | 753  | 99.9  | 0.1 |
|          |                          | 2     | 0     | 775  | 0     | 0    | 0     | 0     | 0     | 0     | 0     | 0    | 0     | 0     | 0     | 0     | 0     | 0     | 775  | 100.0 | 0.0 |
|          |                          | 3     | 0     | 0    | 626   | 0    | 0     | 0     | 0     | 0     | 0     | 2    | 0     | 0     | 0     | 0     | 0     | 0     | 628  | 100.0 | 0.0 |
|          |                          | 4     | 0     | 0    | 0     | 795  | 0     | 0     | 0     | 0     | 0     | 0    | 0     | 0     | 0     | 0     | 0     | 0     | 795  | 99.6  | 0.4 |
|          |                          | 5     | 0     | 0    | 0     | 0    | 1118  | 0     | 0     | 0     | 0     | 0    | 0     | 0     | 0     | 0     | 0     | 0     | 1118 | 100.0 | 0.0 |
|          |                          | 6     | 0     | 0    | 0     | 0    | 0     | 1000  | 0     | 0     | 0     | 0    | 0     | 0     | 0     | 0     | 0     | 0     | 1000 | 100.0 | 0.0 |
|          |                          | 7     | 0     | 0    | 0     | 0    | 0     | 0     | 886   | 0     | 0     | 0    | 0     | 0     | 0     | 0     | 0     | 0     | 886  | 100.0 | 0.0 |
|          |                          | 8     | 0     | 0    | 0     | 0    | 0     | 0     | 0     | 459   | 0     | 0    | 0     | 0     | 0     | 0     | 0     | 0     | 459  | 100.0 | 0.0 |
|          |                          | 9     | 0     | 0    | 0     | 0    | 0     | 0     | 0     | 0     | 0     | 375  | 0     | 0     | 0     | 0     | 0     | 0     | 366  | 100.0 | 0.0 |
|          |                          | 10    | 0     | 0    | 0     | 0    | 0     | 0     | 0     | 0     | 0     | 0    | 1253  | 0     | 0     | 0     | 0     | 0     | 1253 | 100.0 | 0.0 |
|          |                          | 11    | 0     | 0    | 0     | 1    | 0     | 0     | 0     | 0     | 0     | 0    | 0     | 251   | 0     | 0     | 0     | 0     | 252  | 99.6  | 0.4 |
|          |                          | 12    | 0     | 0    | 0     | 0    | 0     | 0     | 0     | 0     | 0     | 0    | 0     | 0     | 491   | 0     | 0     | 2     | 491  | 99.6  | 0.4 |
|          |                          | 13    | 0     | 0    | 0     | 0    | 0     | 0     | 0     | 0     | 0     | 0    | 0     | 0     | 0     | 955   | 0     | 0     | 955  | 100.0 | 0.0 |
|          |                          | 14    | 0     | 0    | 0     | 0    | 0     | 0     | 0     | 0     | 0     | 0    | 0     | 0     | 0     | 0     | 366   | 0     | 366  | 100.0 | 0.0 |
|          |                          | 15    | 0     | 0    | 0     | 0    | 0     | 0     | 0     | 0     | 0     | 0    | 0     | 0     | 0     | 0     | 0     | 870   | 870  | 100.0 | 0.0 |
|          |                          | Total | 752   | 776  | 626   | 796  | 1118  | 1000  | 886   | 459   | 375   | 1255 | 251   | 491   | 955   | 366   | 872   | 10976 | AA   | 99.9  |     |
|          |                          | PA    | 100.0 | 99.9 | 100.0 | 99.9 | 100.0 | 100.0 | 100.0 | 100.0 | 100.0 | 99.8 | 100.0 | 100.0 | 100.0 | 100.0 | 99.8  |       | OA   | 99.9  |     |
|          |                          | EO    | 0.0   | 0.1  | 0.0   | 0.1  | 0.0   | 0.0   | 0.0   | 0.0   | 0.0   | 0.2  | 0.0   | 0.0   | 0.0   | 0.0   | 0.2   |       | KC   | 99.9  |     |
| Approach | Out-of-bag training data |       |       |      |       |      |       |       |       |       |       |      |       |       |       |       |       |       |      |       |     |
| OB       | Class                    | 1     | 2     | 3    | 4     | 5    | 6     | 7     | 8     | 9     | 10    | 11   | 12    | 13    | 14    | 15    | Total | UA    | EC   |       |     |
|          | 1                        | 30    | 0     | 0    | 0     | 0    | 0     | 0     | 0     | 0     | 0     | 0    | 0     | 0     | 0     | 0     | 30    | 100.0 | 0.0  |       |     |



|          |                  |                 |           |           |           |           |           |           |           |           |           |           |           |           |           |           |           |       |       |      |
|----------|------------------|-----------------|-----------|-----------|-----------|-----------|-----------|-----------|-----------|-----------|-----------|-----------|-----------|-----------|-----------|-----------|-----------|-------|-------|------|
|          | Classified image | 2               | 0         | <b>31</b> | 0         | 0         | 0         | 0         | 0         | 0         | 0         | 0         | 0         | 0         | 0         | 0         | 0         | 31    | 100.0 | 0.0  |
|          |                  | 3               | 0         | 0         | <b>30</b> | 0         | 0         | 0         | 0         | 0         | 0         | 0         | 0         | 0         | 0         | 0         | 0         | 30    | 100.0 | 0.0  |
|          |                  | 4               | 0         | 0         | 0         | <b>32</b> | 0         | 0         | 0         | 0         | 0         | 0         | 0         | 0         | 0         | 0         | 0         | 32    | 100.0 | 0.0  |
|          |                  | 5               | 0         | 0         | 0         | 0         | <b>40</b> | 0         | 0         | 0         | 0         | 0         | 0         | 0         | 0         | 0         | 0         | 40    | 100.0 | 0.0  |
|          |                  | 6               | 0         | 0         | 0         | 0         | 0         | <b>40</b> | 0         | 0         | 0         | 0         | 0         | 0         | 0         | 0         | 0         | 40    | 100.0 | 0.0  |
|          |                  | 7               | 0         | 0         | 0         | 0         | 0         | 0         | <b>35</b> | 0         | 0         | 0         | 0         | 0         | 0         | 0         | 0         | 35    | 100.0 | 0.0  |
|          |                  | 8               | 0         | 0         | 0         | 0         | 0         | 0         | 0         | <b>19</b> | 0         | 0         | 0         | 0         | 0         | 0         | 0         | 19    | 100.0 | 0.0  |
|          |                  | 9               | 0         | 0         | 0         | 0         | 0         | 0         | 0         | 0         | <b>15</b> | 0         | 0         | 0         | 0         | 0         | 0         | 15    | 100.0 | 0.0  |
|          |                  | 10              | 0         | 0         | 0         | 0         | 0         | 0         | 0         | 0         | 0         | <b>41</b> | 0         | 0         | 0         | 0         | 0         | 41    | 100.0 | 0.0  |
|          |                  | 11              | 0         | 0         | 0         | 0         | 0         | 0         | 0         | 0         | 0         | 0         | <b>20</b> | 0         | 0         | 0         | 0         | 20    | 100.0 | 0.0  |
|          |                  | 12              | 0         | 0         | 0         | 0         | 0         | 0         | 0         | 0         | 0         | 0         | 0         | <b>19</b> | 0         | 0         | 0         | 19    | 100.0 | 0.0  |
|          |                  | 13              | 0         | 0         | 0         | 0         | 0         | 0         | 0         | 0         | 0         | 0         | 0         | 0         | <b>38</b> | 0         | 0         | 38    | 100.0 | 0.0  |
|          |                  | 14              | 0         | 0         | 0         | 0         | 0         | 0         | 0         | 0         | 0         | 0         | 0         | 0         | 0         | <b>15</b> | 0         | 15    | 100.0 | 0.0  |
|          |                  | 15              | 0         | 0         | 0         | 0         | 0         | 0         | 0         | 0         | 0         | 0         | 0         | 1         | 0         | 0         | <b>35</b> | 36    | 97.2  | 2.8  |
|          |                  | Total           | 30        | 31        | 30        | 32        | 40        | 40        | 35        | 19        | 15        | 41        | 20        | 20        | 38        | 15        | 35        | 441   | AA    | 99.7 |
|          |                  | PA              | 100.0     | 100.0     | 100.0     | 100.0     | 100.0     | 100.0     | 100.0     | 100.0     | 100.0     | 100.0     | 100.0     | 95.0      | 100.0     | 100.0     | 100.0     |       | OA    | 99.8 |
|          |                  | EO              | 0.0       | 0.0       | 0.0       | 0.0       | 0.0       | 0.0       | 0.0       | 0.0       | 0.0       | 0.0       | 0.0       | 5.0       | 0.0       | 0.0       | 0.0       |       | KC    | 99.8 |
| Approach |                  | Validation data |           |           |           |           |           |           |           |           |           |           |           |           |           |           |           |       |       |      |
| PB       | Classified image | Class           | 1         | 2         | 3         | 4         | 5         | 6         | 7         | 8         | 9         | 10        | 11        | 12        | 13        | 14        | 15        | Total | UA    | EC   |
|          |                  | 1               | <b>30</b> | 0         | 0         | 0         | 0         | 0         | 0         | 0         | 0         | 0         | 0         | 0         | 0         | 0         | 0         | 30    | 100.0 | 0.0  |
|          |                  | 2               | 0         | <b>29</b> | 0         | 0         | 0         | 0         | 0         | 0         | 0         | 0         | 0         | 0         | 0         | 0         | 0         | 29    | 100.0 | 0.0  |
|          |                  | 3               | 0         | 1         | <b>28</b> | 0         | 0         | 0         | 0         | 0         | 0         | 1         | 0         | 0         | 0         | 0         | 0         | 30    | 93.3  | 6.7  |
|          |                  | 4               | 0         | 0         | 0         | <b>28</b> | 0         | 0         | 0         | 0         | 0         | 1         | 0         | 0         | 0         | 0         | 0         | 29    | 96.6  | 3.4  |
|          |                  | 5               | 0         | 0         | 0         | 0         | <b>40</b> | 0         | 0         | 0         | 0         | 0         | 0         | 0         | 0         | 0         | 0         | 40    | 100.0 | 0.0  |
|          |                  | 6               | 0         | 0         | 0         | 0         | 0         | <b>38</b> | 2         | 0         | 0         | 0         | 0         | 0         | 0         | 0         | 1         | 41    | 92.7  | 7.3  |
|          |                  | 7               | 0         | 0         | 0         | 0         | 0         | 1         | <b>32</b> | 0         | 0         | 0         | 0         | 0         | 0         | 0         | 0         | 33    | 97.0  | 3.0  |
|          |                  | 8               | 0         | 0         | 0         | 0         | 0         | 0         | 0         | <b>20</b> | 0         | 0         | 0         | 0         | 0         | 0         | 0         | 20    | 100.0 | 0.0  |

|          |                  |                 |       |      |      |      |       |      |      |       |      |      |       |      |       |       |      |       |       |       |      |
|----------|------------------|-----------------|-------|------|------|------|-------|------|------|-------|------|------|-------|------|-------|-------|------|-------|-------|-------|------|
|          |                  | 9               | 0     | 0    | 0    | 0    | 0     | 0    | 0    | 0     | 13   | 0    | 0     | 0    | 0     | 0     | 0    | 13    | 100.0 | 0.0   |      |
|          |                  | 10              | 0     | 0    | 2    | 1    | 0     | 0    | 0    | 0     | 0    | 38   | 0     | 0    | 0     | 0     | 0    | 41    | 92.7  | 7.3   |      |
|          |                  | 11              | 0     | 0    | 0    | 1    | 0     | 0    | 0    | 0     | 0    | 0    | 20    | 0    | 0     | 0     | 0    | 21    | 95.2  | 4.8   |      |
|          |                  | 12              | 0     | 0    | 0    | 0    | 0     | 0    | 0    | 0     | 0    | 0    | 0     | 15   | 0     | 0     | 1    | 16    | 93.8  | 6.2   |      |
|          |                  | 13              | 0     | 0    | 0    | 0    | 0     | 0    | 1    | 0     | 2    | 0    | 0     | 0    | 40    | 0     | 0    | 43    | 93.0  | 7.0   |      |
|          |                  | 14              | 0     | 0    | 0    | 0    | 0     | 0    | 0    | 0     | 0    | 0    | 0     | 0    | 0     | 15    | 0    | 15    | 100.0 | 0.0   |      |
|          |                  | 15              | 0     | 0    | 0    | 0    | 0     | 1    | 0    | 0     | 0    | 0    | 0     | 5    | 0     | 0     | 32   | 38    | 84.2  | 15.8  |      |
|          |                  | Total           | 30    | 30   | 30   | 30   | 40    | 40   | 35   | 20    | 15   | 40   | 20    | 20   | 40    | 15    | 34   | 439   | AA    | 95.5  |      |
|          |                  | PA              | 100.0 | 96.7 | 93.3 | 93.3 | 100.0 | 95.0 | 91.4 | 100.0 | 86.7 | 95.5 | 100.0 | 75.0 | 100.0 | 100.0 | 94.1 |       | OA    | 95.2  |      |
|          |                  | EO              | 0.0   | 3.3  | 6.7  | 6.7  | 0.0   | 5.0  | 8.6  | 0.0   | 13.3 | 5.0  | 0.0   | 25.0 | 0.0   | 0.0   | 5.9  |       | KC    | 94.8  |      |
| Approach |                  | Validation data |       |      |      |      |       |      |      |       |      |      |       |      |       |       |      |       |       |       |      |
| OB       | Classified image | Class           | 1     | 2    | 3    | 4    | 5     | 6    | 7    | 8     | 9    | 10   | 11    | 12   | 13    | 14    | 15   | Total | UA    | EC    |      |
|          |                  | 1               | 30    | 1    | 0    | 0    | 0     | 0    | 0    | 0     | 0    | 0    | 0     | 0    | 0     | 0     | 0    | 0     | 31    | 96.8  | 3.2  |
|          |                  | 2               | 0     | 26   | 0    | 0    | 0     | 0    | 0    | 0     | 0    | 0    | 0     | 0    | 0     | 0     | 0    | 0     | 26    | 100.0 | 0.0  |
|          |                  | 3               | 0     | 3    | 30   | 0    | 0     | 0    | 0    | 0     | 0    | 1    | 0     | 0    | 0     | 0     | 0    | 0     | 34    | 88.2  | 11.8 |
|          |                  | 4               | 0     | 0    | 0    | 28   | 0     | 0    | 0    | 0     | 0    | 1    | 0     | 0    | 0     | 0     | 0    | 0     | 29    | 96.6  | 3.4  |
|          |                  | 5               | 0     | 0    | 0    | 0    | 40    | 4    | 0    | 0     | 0    | 0    | 0     | 0    | 0     | 0     | 0    | 0     | 44    | 90.9  | 9.1  |
|          |                  | 6               | 0     | 0    | 0    | 0    | 0     | 33   | 3    | 0     | 0    | 0    | 0     | 0    | 1     | 0     | 1    | 38    | 86.8  | 13.2  |      |
|          |                  | 7               | 0     | 0    | 0    | 0    | 0     | 1    | 31   | 0     | 0    | 0    | 0     | 0    | 0     | 0     | 0    | 1     | 33    | 93.9  | 6.1  |
|          |                  | 8               | 0     | 0    | 0    | 0    | 0     | 0    | 0    | 20    | 0    | 0    | 0     | 0    | 0     | 0     | 0    | 0     | 20    | 100.0 | 0.0  |
|          |                  | 9               | 0     | 0    | 0    | 0    | 0     | 0    | 0    | 0     | 13   | 0    | 0     | 0    | 1     | 0     | 0    | 14    | 92.9  | 7.1   |      |
|          |                  | 10              | 0     | 0    | 0    | 1    | 0     | 0    | 0    | 0     | 0    | 38   | 0     | 0    | 0     | 0     | 0    | 39    | 97.4  | 2.6   |      |
|          |                  | 11              | 0     | 0    | 0    | 0    | 0     | 0    | 0    | 0     | 0    | 0    | 20    | 0    | 0     | 0     | 0    | 20    | 100.0 | 0.0   |      |
|          |                  | 12              | 0     | 0    | 0    | 0    | 0     | 0    | 0    | 0     | 0    | 0    | 0     | 16   | 0     | 0     | 1    | 17    | 94.1  | 5.9   |      |
|          |                  | 13              | 0     | 0    | 0    | 0    | 0     | 1    | 1    | 0     | 2    | 0    | 0     | 0    | 38    | 0     | 0    | 42    | 90.5  | 9.5   |      |
|          |                  | 14              | 0     | 0    | 0    | 1    | 0     | 0    | 0    | 0     | 0    | 0    | 0     | 0    | 0     | 15    | 0    | 16    | 93.8  | 6.2   |      |
|          |                  | 15              | 0     | 0    | 0    | 0    | 0     | 1    | 0    | 0     | 0    | 0    | 0     | 4    | 0     | 0     | 32   | 37    | 86.5  | 13.5  |      |

|  |  |       |       |      |       |      |       |      |      |       |      |      |       |      |      |       |      |     |    |      |
|--|--|-------|-------|------|-------|------|-------|------|------|-------|------|------|-------|------|------|-------|------|-----|----|------|
|  |  | Total | 30    | 30   | 30    | 30   | 40    | 40   | 35   | 20    | 15   | 40   | 20    | 20   | 40.0 | 15    | 35   | 440 | AA | 93.6 |
|  |  | PA    | 100.0 | 86.7 | 100.0 | 93.3 | 100.0 | 82.5 | 88.6 | 100.0 | 86.7 | 95.0 | 100.0 | 80.0 | 95.0 | 100.0 | 91.4 |     | OA | 93.2 |
|  |  | EO    | 0.0   | 13.3 | 0.0   | 6.7  | 0.0   | 17.5 | 11.4 | 0.0   | 13.3 | 5.0  | 0.0   | 20.0 | 5.0  | 0.0   | 8.6  |     | KC | 92.6 |

**Table S6.** Input variables (raw reflectance, vegetation indices, textural features) of the Reference site (Site A) ranked according to mean decrease in accuracy computed by PB and OB Random Forest classifications applied to the 2021 multi-temporal image. Textural features include the reflectance band and name of the formula (Table 4) they were calculated with. Each input variable is followed by the month of the imagery that it was extracted from.

| Rank | PB                            | OB                    |
|------|-------------------------------|-----------------------|
| 1    | RedEdge717Mean_August         | RedEdge740Mean_July   |
| 2    | Green560Mean_July             | Red668_August         |
| 3    | Red668Mean_August             | Red668Mean_August     |
| 4    | RedEdge705Mean_August         | Green531_August       |
| 5    | Green560Mean_August           | NIR842_July           |
| 6    | Green560AngCorrelation_August | NNIR-1_July           |
| 7    | Green531Mean_August           | Red650Mean_August     |
| 8    | Green531AngCorrelation_August | RedEdge705Mean_August |
| 9    | Red650Mean_August             | RedEdge717Mean_August |
| 10   | RedEdge717_August             | Green560_August       |
| 11   | NDVI.2_June                   | RedEdge717_August     |
| 12   | RedEdge717AngCorrelation_June | NIR842Mean_July       |
| 13   | NR.2_June                     | Green560Mean_August   |
| 14   | RedEdge705_August             | GNDVI-2_July          |
| 15   | Green531_July                 | NG-2_July             |
| 16   | Blue444Mean_June              | RedEdge705_August     |
| 17   | NDAVI.1_June                  | RedEdge740_July       |
| 18   | Red668Mean_June               | NDVI-2_June           |
| 19   | RVI.2_June                    | Green531Mean_August   |
| 20   | Red668_August                 | Red668_July           |
| 21   | Green531Mean_July             | RERVI-1_June          |
| 22   | Green531AngCorrelation_July   | NG-1_July             |
| 23   | RedEdge740Mean_July           | Red650_August         |
| 24   | Blue475Mean_June              | Blue475_August        |
| 25   | RedEdge717AngCorrelation_July | NR-2_June             |
| 26   | Green560AngCorrelation_July   | NR-1_June             |
| 27   | DVI.2_June                    | RERVI-2_June          |
| 28   | RedEdge740Mean_June           | RERVI-2_July          |
| 29   | Red668Mean_July               | RVI-2_June            |
| 30   | RedEdge717St.Dev_June         | NDRE-1_June           |
| 31   | NDAVI.2_June                  | NDRE-2_June           |
| 32   | Green560_July                 | NDVI-2_July           |
| 33   | RedEdge740AngCorrelation_June | Red668Mean_July       |
| 34   | NNIR.2_June                   | GRVI-1_July           |
| 35   | Green560Mean_June             | Blue444Mean_August    |
| 36   | Green560_August               | GNDVI-1_July          |
| 37   | NR.1_June                     | GRVI-2_June           |
| 38   | RedEdge705Mean_June           | NDAVI-2_August        |
| 39   | NIR842Mean_July               | NR-2_July             |
| 40   | Red650Mean_June               | NR-1_July             |
| 41   | Green560AngCorrelation_June   | RVI-1_June            |
| 42   | Red668Entropy_August          | GRVI-2_July           |
| 43   | NIR842AngCorrelation_June     | NDVI-1_June           |
| 44   | Green531AngCorrelation_June   | RERVI-1_July          |
| 45   | NNIR.1_June                   | WAVI-2_July           |

|    |                                 |                           |
|----|---------------------------------|---------------------------|
| 46 | Blue475AngCorrelation_August    | GNDVI-2_June              |
| 47 | RedEdge717Mean_July             | NDVI-1_July               |
| 48 | Green531_August                 | NNIR-1_June               |
| 49 | Blue444Mean_August              | NDAVI-1_July              |
| 50 | Red668GLDVEntropy_June          | NNIR-2_June               |
| 51 | Green531Mean_June               | RVI-2_July                |
| 52 | DVI.1_June                      | Blue475Mean_August        |
| 53 | Red668Ang2ndMoment_June         | Blue475_July              |
| 54 | Red668_June                     | NG-2_August               |
| 55 | RedEdge717Mean_June             | NDRE-2_July               |
| 56 | Blue475Mean_August              | NDAVI-1_August            |
| 57 | Red650AngCorrelation_June       | WAVI-1_August             |
| 58 | Red650_August                   | RVI-1_July                |
| 59 | RedEdge705AngCorrelation_August | WAVI-1_July               |
| 60 | RedEdge717AngCorrelation_August | Blue444_July              |
| 61 | Red668Contrast_June             | NIR842_August             |
| 62 | RVI.1_June                      | DVI-1_June                |
| 63 | Red668_July                     | GDVI-2_July               |
| 64 | Red668Homogeneity_June          | Blue444Mean_July          |
| 65 | Green560St.Dev_July             | DVI-2_June                |
| 66 | NDVI.1_June                     | GRVI-1_August             |
| 67 | NIR842Mean_June                 | GDVI-1_July               |
| 68 | Green560Contrast_June           | RERVI-1_August            |
| 69 | Red668St.Dev_July               | NNIR-2_July               |
| 70 | RedEdge705AngCorrelation_June   | Blue444_August            |
| 71 | Red668Contrast_July             | NDRE-1_July               |
| 72 | Red668AngCorrelation_June       | Green560Mean_July         |
| 73 | NR.2_August                     | NDRE-3_August             |
| 74 | WAVI.2_August                   | Red650Mean_July           |
| 75 | NIR842AngCorrelation_July       | NDAVI-2_June              |
| 76 | Green531St.Dev_July             | GDVI-2_June               |
| 77 | Red650Mean_July                 | NDVI-2_August             |
| 78 | Red668AngCorrelation_July       | RedEdge740Mean_August     |
| 79 | Green531Ang2ndMoment_July       | NDRE-3_June               |
| 80 | Red668Dissimilarity_June        | NIR842Mean_August         |
| 81 | RedEdge740AngCorrelation_August | DVI-1_August              |
| 82 | RERVI.1_June                    | NR-2_August               |
| 83 | GNDVI.2_June                    | DVI-1_July                |
| 84 | Blue444Ang2ndMoment_June        | Green531_July             |
| 85 | NDRE.1_June                     | RERVI-3_June              |
| 86 | Red668GLDVAng2ndMoment_July     | DVI-2_July                |
| 87 | Green531Contrast_June           | RERVI-3_August            |
| 88 | GRVI.2_June                     | GRVI-1_June               |
| 89 | Red650_June                     | Red668Ang2ndMoment_August |
| 90 | RedEdge717St.Dev_July           | NDRE-3_July               |
| 91 | Green531_June                   | Red668Mean_June           |
| 92 | Blue444St.Dev_July              | NIR842_June               |
| 93 | Red668GLDVAng2ndMoment_June     | RedEdge717_July           |
| 94 | GNDVI.1_June                    | RERVI-3_July              |
| 95 | Blue444_June                    | NG-2_June                 |
| 96 | Green531Homogeneity_August      | RVI-2_August              |

|     |                                 |                               |
|-----|---------------------------------|-------------------------------|
| 97  | Green560GLDVAng2ndMoment_July   | NR-1_August                   |
| 98  | Green560GLDVEntropy_June        | RERVI-2_August                |
| 99  | Green531Contrast_July           | Green560_July                 |
| 100 | Green560Entropy_July            | NDAVI-1_June                  |
| 101 | RedEdge740Ang2ndMoment_June     | Blue475Mean_July              |
| 102 | RedEdge717GLDVEntropy_July      | GNDVI-1_August                |
| 103 | Red650Ang2ndMoment_June         | NDRE-2_August                 |
| 104 | Blue475AngCorrelation_July      | DVI-2_August                  |
| 105 | RedEdge717Contrast_June         | GDVI-2_August                 |
| 106 | Green531Entropy_July            | GRVI-2_August                 |
| 107 | Green531GLDVAng2ndMoment_August | NDAVI-2_July                  |
| 108 | RERVI.3_August                  | Red668Entropy_August          |
| 109 | Green531GLDVEntropy_July        | Green560AngCorrelation_August |
| 110 | GRVI.1_June                     | Green531AngCorrelation_August |
| 111 | Green531Contrast_August         | NDVI-1_August                 |
| 112 | RedEdge740Ang2ndMoment_August   | GDVI-1_August                 |
| 113 | Red650AngCorrelation_July       | RedEdge717Mean_July           |
| 114 | RedEdge705Ang2ndMoment_June     | NIR842Mean_June               |
| 115 | NDVI.2_August                   | GNDVI-1_June                  |
| 116 | RedEdge717_June                 | WAVI-2_June                   |
| 117 | Red668St.Dev_June               | Red668_June                   |
| 118 | NIR842_July                     | GNDVI-2_August                |
| 119 | Red650Contrast_June             | Blue475_June                  |
| 120 | Green531Dissimilarity_August    | Green531Mean_July             |
| 121 | NIR842AngCorrelation_August     | RedEdge740Mean_June           |
| 122 | RedEdge717_July                 | Red650_June                   |
| 123 | Green531GLDVEntropy_August      | GDVI-1_June                   |
| 124 | Red668St.Dev_August             | NDRE-1_August                 |
| 125 | Green560Contrast_July           | WAVI-1_June                   |
| 126 | Green531GLDVAng2ndMoment_July   | Blue444Mean_June              |
| 127 | Red668Dissimilarity_July        | Red650Ang2ndMoment_August     |
| 128 | RedEdge717Entropy_June          | Blue444_June                  |
| 129 | Green560Homogeneity_July        | Red668Homogeneity_August      |
| 130 | RedEdge717Ang2ndMoment_June     | NG-1_June                     |
| 131 | Green560GLDVEntropy_July        | Red668GLDVAng2ndMoment_August |
| 132 | RedEdge705Mean_July             | RedEdge705_June               |
| 133 | RedEdge717Contrast_July         | Red650_July                   |
| 134 | RedEdge740Mean_August           | RedEdge740_June               |
| 135 | Blue475AngCorrelation_June      | NG-1_August                   |
| 136 | RedEdge705Entropy_June          | Blue475Mean_June              |
| 137 | Blue444_August                  | RedEdge705_July               |
| 138 | Red650Ang2ndMoment_August       | RVI-1_August                  |
| 139 | Red650St.Dev_July               | RedEdge740_August             |
| 140 | Blue475Contrast_June            | NNIR-1_August                 |
| 141 | RedEdge705_June                 | NNIR-2_August                 |
| 142 | Red650Entropy_August            | Red668St.Dev_August           |
| 143 | Green560Ang2ndMoment_July       | Green531_June                 |
| 144 | NIR842GLDVEntropy_June          | RedEdge705Mean_July           |
| 145 | Red668GLDVAng2ndMoment_August   | Red650Homogeneity_August      |
| 146 | Red668GLDVEntropy_August        | Red650Mean_June               |
| 147 | RedEdge705Contrast_July         | Red668AngCorrelation_June     |



|     |                                 |                                   |
|-----|---------------------------------|-----------------------------------|
| 148 | Green560Homogeneity_August      | Red650Entropy_August              |
| 149 | Blue444Entropy_June             | Red668Dissimilarity_August        |
| 150 | Blue475GLDVEntropy_July         | RedEdge705AngCorrelation_August   |
| 151 | Red668GLDVEntropy_July          | RedeEdge717_June                  |
| 152 | RedEdge740_June                 | Red650GLDVEntropy_August          |
| 153 | RedEdge740GLDVAng2ndMoment_June | Green560_June                     |
| 154 | RedEdge740Homogeneity_June      | RedEdge705Mean_June               |
| 155 | RERVI.3_June                    | Red668GLDVEntropy_August          |
| 156 | NG.2_June                       | Green560Mean_June                 |
| 157 | Red650GLDVEntropy_June          | Green531Mean_June                 |
| 158 | NIR842Homogeneity_July          | Red650GLDVAng2ndMoment_August     |
| 159 | Red650Dissimilarity_June        | Red650AngCorrelation_June         |
| 160 | Green560Ang2ndMoment_June       | Red650Dissimilarity_August        |
| 161 | Green531Homogeneity_July        | RedEdge717Mean_June               |
| 162 | Green531Dissimilarity_July      | RedEdge717AngCorrelation_June     |
| 163 | Green560Dissimilarity_June      | Red668Contrast_August             |
|     | RedEdge717GLDVAng2ndMoment_Au-  |                                   |
| 164 | gust                            | Red650St.Dev_August               |
| 165 | Blue444Contrast_June            | RedEdge705AngCorrelation_July     |
| 166 | Green560Dissimilarity_July      | RedEdge717AngCorrelation_August   |
| 167 | Green560St.Dev_June             | WAVI-2_August                     |
| 168 | RedEdge740AngCorrelation_July   | Red650AngCorrelation_August       |
| 169 | NIR842Entropy_June              | Blue475AngCorrelation_June        |
| 170 | Red650Homogeneity_June          | RedEdge705AngCorrelation_June     |
| 171 | Green531Ang2ndMoment_June       | RedEdge717AngCorrelation_July     |
| 172 | RedEdge705Ang2ndMoment_August   | Green531Dissimilarity_August      |
| 173 | NIR842Ang2ndMoment_June         | RedEdge705St.Dev_August           |
| 174 | Green560GLDVEntropy_August      | Green531GLDVAng2ndMoment_August   |
| 175 | NIR842_June                     | RedEdge705Contrast_August         |
| 176 | Red650Contrast_July             | NIR842GLDVEntropy_July            |
| 177 | Green560GLDVAng2ndMoment_August | RedEdge717St.Dev_August           |
| 178 | RedEdge717GLDVAng2ndMoment_June | Red650AngCorrelation_July         |
| 179 | Blue444Homogeneity_August       | Red668AngCorrelation_July         |
| 180 | RedEdge717Entropy_July          | RedEdge740Entropy_July            |
| 181 | RedEdge740_July                 | Red650Contrast_August             |
| 182 | Green531Ang2ndMoment_August     | Green531Homogeneity_August        |
| 183 | Blue475Contrast_August          | Green531Contrast_August           |
| 184 | Green531St.Dev_June             | Green531Ang2ndMoment_August       |
| 185 | RedEdge740Entropy_June          | Green560AngCorrelation_June       |
| 186 | Red650GLDVEntropy_July          | Green560GLDVEntropy_August        |
| 187 | RedEdge705Dissimilarity_July    | RedEdge705Entropy_August          |
| 188 | RedEdge740Ang2ndMoment_July     | Blue444AngCorrelation_June        |
| 189 | RedEdge717Dissimilarity_July    | Green531GLDVEntropy_August        |
| 190 | Blue475Contrast_July            | RedEdge705GLDVEntropy_August      |
| 191 | Green560_June                   | RedEdge740Ang2ndMoment_June       |
| 192 | RERVI.2_June                    | Green531AngCorrelation_July       |
| 193 | Blue444AngCorrelation_July      | RedEdge705Ang2ndMoment_August     |
| 194 | Red650GLDVAng2ndMoment_June     | Red668GLDVAng2ndMoment_July       |
| 195 | Blue475_August                  | Red668St.Dev_July                 |
| 196 | Green531Entropy_August          | RedEdge740GLDVEntropy_August      |
| 197 | RedEdge717Dissimilarity_August  | RedEdge717GLDVAng2ndMoment_August |

|     |                                   |                                   |
|-----|-----------------------------------|-----------------------------------|
| 198 | Red650Dissimilarity_July          | RedEdge705Dissimilarity_August    |
| 199 | Blue475_June                      | RedEdge740AngCorrelation_July     |
| 200 | Blue475St.Dev_July                | Green560Entropy_August            |
| 201 | Red650St.Dev_August               | Red668Entropy_July                |
| 202 | Green531GLDVEntropy_June          | Blue444Ang2ndMoment_August        |
| 203 | Blue475GLDVEntropy_August         | Blue475GLDVAng2ndMoment_August    |
| 204 | GDVI.1_June                       | NIR842Ang2ndMoment_June           |
| 205 | RedEdge705Contrast_August         | Blue475Entropy_August             |
| 206 | Green560Contrast_August           | Green531St.Dev_August             |
| 207 | NIR842Dissimilarity_July          | RedEdge717Entropy_August          |
| 208 | Green560GLDVAng2ndMoment_June     | RedEdge705GLDVAng2ndMoment_August |
| 209 | WAVI.2_June                       | RedEdge740Entropy_August          |
| 210 | RedEdge705GLDVAng2ndMoment_August | RedEdge740Homogeneity_August      |
| 211 | NR.1_August                       | Green560Dissimilarity_August      |
| 212 | Red668Entropy_July                | RedEdge717Contrast_August         |
| 213 | RedEdge705GLDVEntropy_July        | Green531AngCorrelation_June       |
| 214 | NIR842Contrast_July               | Red668Entropy_June                |
| 215 | NIR842Contrast_August             | RedEdge740Ang2ndMoment_August     |
| 216 | NG.1_June                         | RedEdge740GLDVAng2ndMoment_July   |
| 217 | RedEdge717Homogeneity_July        | Red668Dissimilarity_June          |
| 218 | Red668Homogeneity_July            | RedEdge705GLDVAng2ndMoment_July   |
| 219 | RedEdge740Contrast_June           | RedEdge740GLDVEntropy_July        |
| 220 | RedEdge717Ang2ndMoment_July       | NIR842Entropy_July                |
| 221 | Blue444GLDVEntropy_August         | Red668Ang2ndMoment_June           |
| 222 | Blue444Homogeneity_July           | Red668GLDVAng2ndMoment_June       |
| 223 | NDRE.2_June                       | RedEdge717GLDVEntropy_August      |
| 224 | Red650St.Dev_June                 | NIR842St.Dev_August               |
| 225 | Red668Entropy_June                | Green560GLDVAng2ndMoment_August   |
| 226 | Blue444Contrast_July              | RedEdge740GLDVAng2ndMoment_August |
| 227 | Blue444Homogeneity_June           | Green560AngCorrelation_July       |
| 228 | Blue475Ang2ndMoment_June          | Red668GLDVEntropy_July            |
| 229 | Red668Contrast_August             | Blue475Homogeneity_August         |
| 230 | NIR842Dissimilarity_June          | NIR842Homogeneity_August          |
| 231 | Green560Dissimilarity_August      | Red668Homogeneity_June            |
| 232 | Blue444GLDVAng2ndMoment_July      | RedEdge740St.Dev_August           |
| 233 | Blue475Dissimilarity_July         | RedEdge717Homogeneity_August      |
| 234 | Green531Homogeneity_June          | Red650Contrast_July               |
| 235 | Green531Dissimilarity_June        | RedEdge717Dissimilarity_August    |
| 236 | RedEdge740St.Dev_June             | Red668AngCorrelation_August       |
| 237 | WAVI.1_June                       | Red668GLDVEntropy_June            |
| 238 | GDVI.2_June                       | Red668Contrast_July               |
| 239 | Blue444Ang2ndMoment_July          | RedEdge705St.Dev_July             |
| 240 | Blue444Dissimilarity_July         | Blue444St.Dev_June                |
| 241 | RVI.2_August                      | RedEdge717Ang2ndMoment_June       |
| 242 | RedEdge705Entropy_August          | RedEdge740Homogeneity_July        |
| 243 | DVI.1_August                      | Blue475Ang2ndMoment_June          |
| 244 | Red668Homogeneity_August          | Blue444Entropy_August             |
| 245 | NIR842Mean_August                 | RedEdge740Contrast_August         |
| 246 | NIR842Homogeneity_June            | RedEdge740Ang2ndMoment_July       |
| 247 | NIR842GLDVAng2ndMoment_July       | Green531Entropy_August            |

|     |                                   |                                 |
|-----|-----------------------------------|---------------------------------|
| 248 | Blue444Entropy_July               | Red668Dissimilarity_July        |
| 249 | NIR842GLDVEntropy_August          | RedEdge740AngCorrelation_June   |
| 250 | RedEdge705_July                   | Green560Homogeneity_August      |
| 251 | RedEdge705Homogeneity_July        | Green560Contrast_August         |
| 252 | RedEdge740GLDVEntropy_June        | Red668Contrast_June             |
| 253 | RedEdge705GLDVAng2ndMoment_July   | RedEdge705Homogeneity_August    |
| 254 | RedEdge740St.Dev_August           | Green531GLDVEntropy_June        |
| 255 | RedEdge717GLDVAng2ndMoment_July   | Red650Entropy_July              |
| 256 | RedEdge740Homogeneity_August      | Blue475St.Dev_August            |
| 257 | NIR842St.Dev_August               | Green560Ang2ndMoment_August     |
| 258 | NDRE.3_August                     | NIR842Entropy_June              |
| 259 | Blue475GLDVAng2ndMoment_June      | Blue444Contrast_July            |
| 260 | RedEdge740Contrast_August         | Red668Ang2ndMoment_July         |
| 261 | Blue444Ang2ndMoment_August        | NIR842AngCorrelation_July       |
| 262 | Red650_July                       | Blue444Homogeneity_August       |
| 263 | Blue475Entropy_July               | Blue475Ang2ndMoment_August      |
| 264 | RedEdge717Ang2ndMoment_August     | RedEdge705Ang2ndMoment_June     |
| 265 | Blue475GLDVAng2ndMoment_July      | Green531St.Dev_July             |
| 266 | Blue444AngCorrelation_June        | Green531Ang2ndMoment_July       |
| 267 | RedEdge705St.Dev_June             | Green560St.Dev_July             |
| 268 | Blue444GLDVAng2ndMoment_June      | RedEdge740St.Dev_June           |
| 269 | RedEdge740Dissimilarity_August    | Blue475Contrast_June            |
| 270 | NG.2_July                         | Red650GLDVAng2ndMoment_June     |
| 271 | Red668Ang2ndMoment_July           | Blue475AngCorrelation_August    |
| 272 | Red650Entropy_July                | RedEdge740AngCorrelation_August |
| 273 | Red650GLDVAng2ndMoment_July       | Green531Contrast_June           |
| 274 | RedEdge705Ang2ndMoment_July       | NIR842Ang2ndMoment_July         |
| 275 | RedEdge717St.Dev_August           | Blue444Ang2ndMoment_June        |
| 276 | Blue444Entropy_August             | Green531St.Dev_June             |
| 277 | RedEdge705Homogeneity_June        | Green560Contrast_July           |
| 278 | RedEdge705St.Dev_July             | RedEdge705Contrast_July         |
| 279 | NIR842Ang2ndMoment_August         | NIR842GLDVEntropy_August        |
| 280 | NIR842St.Dev_June                 | Blue475Homogeneity_June         |
| 281 | RedEdge740Entropy_August          | RedEdge705Homogeneity_July      |
| 282 | RedEdge705AngCorrelation_July     | RedEdge717Ang2ndMoment_August   |
| 283 | RedEdge705Entropy_July            | Blue444Homogeneity_June         |
| 284 | RedEdge717GLDVEntropy_June        | RedEdge740Contrast_June         |
| 285 | NDRE.3_June                       | NIR842Dissimilarity_June        |
| 286 | RedEdge740Dissimilarity_June      | Red650St.Dev_July               |
| 287 | RERVI.3_July                      | NIR842Homogeneity_June          |
| 288 | NIR842Contrast_June               | Green560GLDVAng2ndMoment_July   |
| 289 | RedEdge705GLDVEntropy_August      | Red650Dissimilarity_July        |
| 290 | Blue475Homogeneity_July           | RedEdge717Entropy_July          |
| 291 | Red650Ang2ndMoment_July           | Blue444Contrast_August          |
| 292 | RedEdge740GLDVAng2ndMoment_August | Blue444St.Dev_August            |
| 293 | NIR842Dissimilarity_August        | Blue444GLDVAng2ndMoment_June    |
| 294 | RedEdge717Homogeneity_June        | Green531Dissimilarity_July      |
| 295 | Green560Homogeneity_June          | Green560Ang2ndMoment_June       |
| 296 | Red668Ang2ndMoment_August         | RedEdge705Dissimilarity_July    |
| 297 | NIR842Ang2ndMoment_July           | NIR842GLDVAng2ndMoment_July     |

|     |                                 |                                 |
|-----|---------------------------------|---------------------------------|
| 298 | NIR842GLDVAng2ndMoment_June     | Red668St.Dev_June               |
| 299 | Blue444Mean_July                | NIR842Contrast_June             |
| 300 | Blue444_July                    | Green531Entropy_July            |
| 301 | RedEdge740GLDVEntropy_August    | Green560Entropy_July            |
| 302 | Blue475Dissimilarity_June       | Red650GLDVAng2ndMoment_July     |
| 303 | Green560St.Dev_August           | RedEdge717Homogeneity_July      |
| 304 | Green531Entropy_June            | RedEdge705GLDVAng2ndMoment_June |
| 305 | RedEdge705St.Dev_August         | Blue475St.Dev_July              |
| 306 | Red650Entropy_June              | RedEdge717Contrast_June         |
| 307 | Blue475Ang2ndMoment_July        | RedEdge740Homogeneity_June      |
| 308 | Blue475Dissimilarity_August     | Green531GLDVAng2ndMoment_July   |
| 309 | Red668Dissimilarity_August      | Blue444Entropy_June             |
| 310 | GDVI.2_July                     | RedEdge740Dissimilarity_August  |
| 311 | Red650GLDVAng2ndMoment_August   | Red650Homogeneity_June          |
| 312 | Green531GLDVAng2ndMoment_June   | Green560Ang2ndMoment_July       |
| 313 | RedEdge705Dissimilarity_June    | Green560GLDVEntropy_July        |
| 314 | RedEdge717Homogeneity_August    | RedEdge717Dissimilarity_July    |
| 315 | Blue475Mean_July                | RedEdge740Contrast_July         |
| 316 | RedEdge740St.Dev_July           | Green560Contrast_June           |
| 317 | Blue475Homogeneity_August       | Blue475Contrast_August          |
| 318 | RedEdge717Dissimilarity_June    | Red650Ang2ndMoment_July         |
| 319 | Blue475St.Dev_June              | Blue444AngCorrelation_August    |
| 320 | GDVI.1_July                     | RedEdge705St.Dev_June           |
| 321 | RedEdge705Contrast_June         | RedEdge705Entropy_July          |
| 322 | Blue475Homogeneity_June         | NIR842Dissimilarity_August      |
| 323 | Blue444GLDVEntropy_July         | Blue444Dissimilarity_June       |
| 324 | RedEdge705Homogeneity_August    | Red650St.Dev_June               |
| 325 | RedEdge705GLDVAng2ndMoment_June | RedEdge717GLDVAng2ndMoment_June |
| 326 | NIR842GLDVAng2ndMoment_August   | Green560Homogeneity_July        |
| 327 | RedEdge705GLDVEntropy_June      | RedEdge740St.Dev_July           |
| 328 | Green560Entropy_June            | Blue475St.Dev_June              |
| 329 | RedEdge740Homogeneity_July      | Green560Dissimilarity_July      |
| 330 | Blue444St.Dev_June              | Red650Homogeneity_July          |
| 331 | RVI.1_August                    | NIR842Entropy_August            |
| 332 | Green560Entropy_August          | RedEdge717St.Dev_July           |
| 333 | NIR842Homogeneity_August        | Blue444GLDVAng2ndMoment_August  |
| 334 | NDRE.3_July                     | Green560St.Dev_August           |
| 335 | Red650AngCorrelation_August     | Blue475Entropy_June             |
| 336 | Blue475Entropy_June             | Blue475GLDVAng2ndMoment_June    |
| 337 | Blue475GLDVEntropy_June         | RedEdge705Homogeneity_June      |
| 338 | NIR842_August                   | Green560Dissimilarity_June      |
| 339 | Red650Homogeneity_July          | RedEdge717Contrast_July         |
| 340 | RedEdge705Dissimilarity_August  | RedEdge717GLDVAng2ndMoment_July |
| 341 | Blue444GLDVEntropy_June         | Red650Ang2ndMoment_June         |
| 342 | NIR842GLDVEntropy_July          | RedEdge705Dissimilarity_June    |
| 343 | RedEdge740Contrast_July         | NIR842AngCorrelation_June       |
| 344 | Blue444Dissimilarity_August     | Blue444GLDVEntropy_August       |
| 345 | NIR842St.Dev_July               | Green531Entropy_June            |
| 346 | RedEdge740Dissimilarity_July    | RedEdge705Entropy_June          |
| 347 | WAVI.1_July                     | RedEdge717St.Dev_June           |
| 348 | RedEdge740GLDVEntropy_July      | RedEdge740GLDVAng2ndMoment_June |

|     |                                 |                               |
|-----|---------------------------------|-------------------------------|
| 349 | Green531St.Dev_August           | Blue444Homogeneity_July       |
| 350 | NIR842Entropy_July              | Red668Homogeneity_July        |
| 351 | DVI.2_August                    | RedEdge705Ang2ndMoment_July   |
| 352 | RERVI.1_August                  | NIR842AngCorrelation_August   |
| 353 | Red650Dissimilarity_August      | Blue444GLDVEntropy_June       |
| 354 | Blue444Dissimilarity_June       | RedEdge717Dissimilarity_June  |
| 355 | Green560Ang2ndMoment_August     | Blue444St.Dev_July            |
| 356 | Red668AngCorrelation_August     | Blue475Ang2ndMoment_July      |
| 357 | Red650GLDVEntropy_August        | Blue475GLDVAng2ndMoment_July  |
| 358 | RedEdge740GLDVAng2ndMoment_July | RedEdge705GLDVEntropy_June    |
| 359 | GRVI.2_July                     | RedEdge717Homogeneity_June    |
| 360 | Red650Contrast_August           | Green560GLDVAng2ndMoment_June |
| 361 | GNDVI.2_July                    | Red650Contrast_June           |
| 362 | RERVI.1_July                    | RedEdge705Contrast_June       |
| 363 | Blue475_July                    | NIR842GLDVAng2ndMoment_June   |
| 364 | NG.1_July                       | Green531Homogeneity_July      |
| 365 | Blue475GLDVAng2ndMoment_August  | NIR842Homogeneity_July        |
| 366 | DVI.1_July                      | NIR842St.Dev_July             |
| 367 | RedEdge717GLDVEntropy_August    | Blue475GLDVEntropy_June       |
| 368 | WAVI.2_July                     | RedEdge740Dissimilarity_June  |
| 369 | DVI.2_July                      | Blue444Ang2ndMoment_July      |
| 370 | GNDVI.1_July                    | Green531Ang2ndMoment_June     |
| 371 | RedEdge740Entropy_July          | Green560St.Dev_June           |
| 372 | RedEdge740_August               | NIR842GLDVEntropy_June        |
| 373 | RVI.1_July                      | Blue444Entropy_July           |
| 374 | NIR842Entropy_August            | Blue444GLDVAng2ndMoment_July  |
| 375 | NDRE.1_August                   | Blue444Contrast_June          |
| 376 | NR.1_July                       | Green531GLDVAng2ndMoment_June |
| 377 | NNIR.1_August                   | Blue475Homogeneity_July       |
| 378 | RedEdge717Entropy_August        | Blue475Contrast_July          |
| 379 | NNIR.2_August                   | Blue475GLDVEntropy_July       |
| 380 | NDRE.2_July                     | Blue475Dissimilarity_August   |
| 381 | GDVI.2_August                   | Blue475Dissimilarity_June     |
| 382 | Red650Homogeneity_August        | RedEdge717Ang2ndMoment_July   |
| 383 | RERVI.2_August                  | RedEdge717GLDVEntropy_July    |
| 384 | NR.2_July                       | RedEdge740Dissimilarity_July  |
| 385 | Blue475St.Dev_August            | Blue475GLDVEntropy_August     |
| 386 | RERVI.2_July                    | Green560GLDVEntropy_June      |
| 387 | GRVI.1_July                     | Red650Dissimilarity_June      |
| 388 | Blue475Entropy_August           | NIR842Contrast_August         |
| 389 | NDVI.1_August                   | Green560Entropy_June          |
| 390 | RVI.2_July                      | Red650GLDVEntropy_June        |
| 391 | NNIR.1_July                     | RedEdge740Entropy_June        |
| 392 | NDAVI.2_July                    | Blue444AngCorrelation_July    |
| 393 | NDAVI.1_August                  | Blue475Entropy_July           |
| 394 | NNIR.2_July                     | Red650GLDVEntropy_July        |
| 395 | RedEdge717Contrast_August       | Green531Homogeneity_June      |
| 396 | NDAVI.2_August                  | RedEdge717GLDVEntropy_June    |
| 397 | WAVI.1_August                   | NIR842Ang2ndMoment_August     |
| 398 | Blue444GLDVAng2ndMoment_August  | RedEdge740GLDVEntropy_June    |
| 399 | Blue444Contrast_August          | Blue475Dissimilarity_July     |

|     |                              |                               |
|-----|------------------------------|-------------------------------|
| 400 | NDRE.2_August                | Green531Dissimilarity_June    |
| 401 | Blue444AngCorrelation_August | RedEdge717Entropy_June        |
| 402 | GRVI.1_August                | Blue444GLDVEntropy_July       |
| 403 | GDVI.1_August                | Green560Homogeneity_June      |
| 404 | NDAVI.1_July                 | NIR842St.Dev_June             |
| 405 | GNDVI.1_August               | Blue444Dissimilarity_July     |
| 406 | NDVI.1_July                  | Green531Contrast_July         |
| 407 | GRVI.2_August                | Red650Entropy_June            |
| 408 | NG.2_August                  | NIR842Contrast_July           |
| 409 | NDVI.2_July                  | NIR842GLDVAng2ndMoment_August |
| 410 | NDRE.1_July                  | Blue475AngCorrelation_July    |
| 411 | GNDVI.2_August               | NIR842Dissimilarity_July      |
| 412 | Blue475Ang2ndMoment_August   | Blue444Dissimilarity_August   |
| 413 | NG.1_2021060810              | Green531GLDVEntropy_July      |
| 414 | Blue444St.Dev_August         | RedEdge705GLDVEntropy_July    |



**Table S7.** Input variables (raw reflectance, vegetation indices, textural features) of the Restoration site (Site B) ranked according to mean decrease in accuracy computed by PB and OB Random Forest classifications applied to the 2021 multi-temporal image. Textural features include the reflectance band and name of the formula (Table 4) they were calculated with. Each input variable is followed by the month of the imagery that it was extracted from.

| Rank | PB                                | OB                    |
|------|-----------------------------------|-----------------------|
| 1    | RedEdge740AngCorrelation_August   | NR-2_August           |
| 2    | Green531Mean_July                 | Blue475_August        |
| 3    | Green531_July                     | NDAVI-1_August        |
| 4    | Green560_Mean_August              | NR-1_August           |
| 5    | NIR842Mean_June                   | NIR842Mean_June       |
| 6    | GRVI.2_June                       | Red668_August         |
| 7    | Red668Mean_July                   | GNDVI-2_July          |
| 8    | RedEdge717Mean_August             | RedeEdge717_August    |
| 9    | NIR842Mean_August                 | NNIR-1_June           |
| 10   | Blue444Mean_August                | Green560Mean_August   |
| 11   | Red650Mean_June                   | NDRE-1_July           |
| 12   | Blue444Mean_July                  | GNDVI-1_August        |
| 13   | RedEdge740Mean_August             | Blue475Mean_August    |
| 14   | NIR842Mean_July                   | Green560_August       |
| 15   | Green560_July                     | DVI-2_June            |
| 16   | Red650Mean_July                   | NDVI-1_August         |
| 17   | NNIR.1_June                       | NNIR-2_August         |
| 18   | Green531Mean_August               | Red650_August         |
| 19   | Green531Contrast_August           | Green560Mean_June     |
| 20   | RedEdge717_August                 | Green531Mean_August   |
| 21   | Blue444AngCorrelation_August      | GNDVI-2_August        |
| 22   | RedEdge717St.Dev_August           | GRVI-1_July           |
| 23   | Blue475Mean_July                  | GDVI-1_August         |
| 24   | Blue444AngCorrelation_July        | RVI-1_June            |
| 25   | RedEdge717Dissimilarity_July      | NDAVI-2_July          |
| 26   | RVI.1_June                        | NG-2_August           |
| 27   | RedEdge717Mean_July               | GRVI-1_August         |
| 28   | RedEdge740GLDVAng2ndMoment_August | GDVI-1_June           |
| 29   | NIR842Ang2ndMoment_August         | NDVI-2_August         |
| 30   | Green531St.Dev_August             | NNIR-1_August         |
| 31   | Blue444Mean_June                  | WAVI-2_June           |
| 32   | Green531_August                   | RedEdge717Mean_August |
| 33   | RedEdge717Contrast_July           | NDAVI-1_July          |
| 34   | GRVI.1_June                       | NIR842_June           |
| 35   | WAVI.2_June                       | NIR842Mean_July       |
| 36   | DVI.1_June                        | RedEdge740_August     |
| 37   | RedEdge740AngCorrelation_July     | NG-1_August           |
| 38   | RedEdge705Mean_August             | NNIR-2_July           |
| 39   | Red668AngCorrelation_July         | RERVI-1_July          |
| 40   | NIR842Contrast_August             | NR-1_July             |
| 41   | Green531GLDVEntropy_August        | Blue475_July          |
| 42   | Green560Mean_July                 | WAVI-1_June           |
| 43   | GNDVI.2_June                      | RVI-2_August          |
| 44   | NDVI.1_June                       | Green531_August       |

|    |                                 |                              |
|----|---------------------------------|------------------------------|
| 45 | Blue475AngCorrelation_July      | NNIR-1_July                  |
| 46 | RedEdge717St.Dev_July           | GRVI-1_June                  |
| 47 | Green531Homogeneity_August      | RERVI-1_August               |
| 48 | Red668Ang2ndMoment_August       | NDVI-1_June                  |
| 49 | Red650Entropy_June              | NG-2_July                    |
| 50 | Green531Dissimilarity_August    | RVI-2_July                   |
| 51 | NNIR.2_June                     | NNIR-2_June                  |
| 52 | NIR842Entropy_August            | Green560_July                |
| 53 | Blue444_August                  | GDVI-2_June                  |
| 54 | RedEdge740GLDVEntropy_July      | Green531St.Dev_June          |
| 55 | RedEdge705Dissimilarity_August  | NIR842_August                |
| 56 | RedEdge705Mean_July             | Green531Contrast_June        |
| 57 | NDAVI.1_August                  | NG-1_July                    |
| 58 | NIR842AngCorrelation_August     | Blue444Mean_June             |
| 59 | Blue475GLDVEntropy_August       | Red650Mean_July              |
| 60 | Red668AngCorrelation_August     | GDVI-1_July                  |
| 61 | NIR842AngCorrelation_June       | Blue444_July                 |
| 62 | Red668Mean_June                 | DVI-1_August                 |
| 63 | RedEdge717Ang2ndMoment_July     | NIR842Entropy_July           |
| 64 | RedEdge740Ang2ndMoment_August   | RedEdge705_August            |
| 65 | RedEdge705Entropy_August        | Red650Entropy_July           |
| 66 | RedEdge717Contrast_August       | NR-2_July                    |
| 67 | RedEdge705Contrast_August       | Green531Dissimilarity_August |
| 68 | RedEdge705AngCorrelation_August | RedEdge740Ang2ndMoment_July  |
| 69 | NG.2_June                       | Green531Mean_July            |
| 70 | Green560_August                 | Red650Homogeneity_July       |
| 71 | Red650GLDVEntropy_August        | RedEdge717Mean_July          |
| 72 | NIR842Dissimilarity_August      | RERVI-3_June                 |
| 73 | RVI.2_August                    | GDVI-2_July                  |
| 74 | DVI.2_June                      | WAVI-2_July                  |
| 75 | Blue475Mean_June                | RedEdge740Mean_August        |
| 76 | NIR842GLDVEntropy_August        | RedEdge717_July              |
| 77 | Red650Homogeneity_June          | DVI-2_July                   |
| 78 | RedEdge740Mean_July             | Green531Homogeneity_June     |
| 79 | NR.2_August                     | DVI-1_June                   |
| 80 | RedEdge740Contrast_August       | GRVI-2_June                  |
| 81 | Blue475AngCorrelation_August    | DVI-2_August                 |
| 82 | RedEdge705GLDVEntropy_August    | NDRE-1_June                  |
| 83 | NDAVI.2_June                    | NDVI-2_July                  |
| 84 | RedEdge717Entropy_July          | GDVI-2_August                |
| 85 | RedEdge705St.Dev_July           | WAVI-1_August                |
| 86 | Red650AngCorrelation_July       | RedEdge705St.Dev_June        |
| 87 | Blue475St.Dev_August            | RedEdge740Mean_June          |
| 88 | RedEdge717Homogeneity_July      | Blue475AngCorrelation_July   |
| 89 | Green560Mean_June               | Green531_July                |
| 90 | RedEdge717GLDVAng2ndMoment_July | Red650Ang2ndMoment_June      |
| 91 | WAVI.1_June                     | RedEdge705Mean_August        |
| 92 | NIR842Homogeneity_June          | NDVI-1_July                  |
| 93 | Red650Entropy_July              | Blue444Mean_August           |
| 94 | Red668Entropy_August            | NG-1_June                    |
| 95 | GDVI.1_June                     | GNDVI-1_July                 |

|     |                                   |                                   |
|-----|-----------------------------------|-----------------------------------|
| 96  | Red668Homogeneity_August          | Green531Contrast_August           |
| 97  | RedEdge705AngCorrelation_July     | RedEdge717Ang2ndMoment_August     |
| 98  | Green531GLDVAng2ndMoment_July     | RedEdge717Dissimilarity_July      |
| 99  | RedEdge717GLDVEntropy_July        | Red668_July                       |
| 100 | RedEdge740Homogeneity_August      | NDRE-3_July                       |
| 101 | Red668St.Dev_August               | WAVI-2_August                     |
| 102 | GNDVI.1_June                      | NIR842Mean_August                 |
| 103 | Red650GLDVAng2ndMoment_June       | Blue444_June                      |
| 104 | NIR842St.Dev_August               | Red668Mean_June                   |
| 105 | Red650Entropy_August              | RedEdge740Mean_July               |
| 106 | Green560GLDVEntropy_August        | Green531Mean_June                 |
| 107 | RedEdge740Mean_June               | Green531St.Dev_July               |
| 108 | RedEdge717GLDVEntropy_August      | RERVI-1_June                      |
| 109 | NR.2_June                         | Green560Mean_July                 |
| 110 | Red668Homogeneity_June            | RedEdge717GLDVAng2ndMoment_August |
| 111 | Green531Contrast_July             | Red650Contrast_July               |
| 112 | Blue444Entropy_August             | RedEdge705Contrast_July           |
| 113 | RedEdge705Ang2ndMoment_August     | RedEdge717St.Dev_August           |
| 114 | NIR842GLDVAng2ndMoment_June       | GNDVI-1_June                      |
| 115 | Red668Ang2ndMoment_June           | NG-2_June                         |
| 116 | Blue444GLDVEntropy_August         | Blue475_June                      |
| 117 | NDVI.2_August                     | Green531Homogeneity_August        |
| 118 | Green531Mean_June                 | Green531Dissimilarity_June        |
| 119 | NIR842_August                     | RedEdge717Homogeneity_July        |
| 120 | NIR842St.Dev_June                 | Red668Mean_July                   |
| 121 | NIR842Homogeneity_August          | RedEdge717Entropy_July            |
| 122 | RedEdge705Homogeneity_August      | Green560Contrast_August           |
| 123 | RedEdge740GLDVEntropy_August      | Red650AngCorrelation_August       |
| 124 | RedEdge717GLDVAng2ndMoment_August | NR-2_June                         |
| 125 | RedEdge717Homogeneity_August      | NDAVI-2_August                    |
| 126 | Red668GLDVEntropy_August          | Red650Mean_June                   |
| 127 | NIR842AngCorrelation_July         | RedEdge705GLDVEntropy_June        |
| 128 | RedEdge740Homogeneity_June        | Green531Contrast_July             |
| 129 | Blue444St.Dev_July                | Green560Entropy_July              |
| 130 | RedEdge705St.Dev_August           | RedEdge717GLDVAng2ndMoment_July   |
| 131 | Blue444AngCorrelation_June        | RedEdge717AngCorrelation_August   |
| 132 | NIR842Contrast_July               | GNDVI-2_June                      |
| 133 | NG.2_July                         | NDRE-3_June                       |
| 134 | NR.1_June                         | RERVI-2_June                      |
| 135 | Red668_July                       | Blue475Dissimilarity_June         |
| 136 | NIR842GLDVAng2ndMoment_August     | Red650Dissimilarity_June          |
| 137 | RVI.2_June                        | Green560Contrast_July             |
| 138 | GDVI.2_June                       | Green560GLDVEntropy_July          |
| 139 | Green560Dissimilarity_August      | RedEdge717GLDVEntropy_July        |
| 140 | RedEdge705GLDVAng2ndMoment_August | NDAVI-2_June                      |
| 141 | Red650AngCorrelation_August       | Green560Homogeneity_July          |
| 142 | Green560AngCorrelation_July       | Green560Contrast_June             |
| 143 | Red668GLDVEntropy_June            | Green531GLDVEntropy_July          |
| 144 | NIR842Dissimilarity_June          | Red668AngCorrelation_July         |

|     |                                 |                                 |
|-----|---------------------------------|---------------------------------|
| 145 | NIR842Entropy_July              | Blue444GLDVAng2ndMoment_August  |
| 146 | Blue444_July                    | Green531GLDVAng2ndMoment_August |
| 147 | NIR842St.Dev_July               | Red650Contrast_June             |
| 148 | RedEdge740St.Dev_August         | RedEdge740AngCorrelation_June   |
| 149 | RedEdge740Dissimilarity_June    | RedEdge717Ang2ndMoment_July     |
| 150 | RedEdge705_August               | Green531Ang2ndMoment_August     |
| 151 | NIR842GLDVAng2ndMoment_July     | Green560Dissimilarity_June      |
| 152 | Green560Contrast_July           | Green560GLDVAng2ndMoment_August |
| 153 | NDAVI.1_July                    | Red650_June                     |
| 154 | NG.1_June                       | RedEdge740_June                 |
| 155 | Blue475Contrast_August          | GRVI-2_August                   |
| 156 | Red668Dissimilarity_August      | RERVI-3_August                  |
| 157 | Red650GLDVEntropy_June          | Blue444AngCorrelation_June      |
| 158 | Green531AngCorrelation_July     | Green531Ang2ndMoment_July       |
| 159 | Red668Entropy_June              | Red650St.Dev_July               |
| 160 | NIR842Contrast_June             | RedEdge705Mean_July             |
| 161 | Red650St.Dev_July               | RedEdge740AngCorrelation_July   |
| 162 | RERVI.2_June                    | Blue444Ang2ndMoment_August      |
| 163 | DVI.2_August                    | RedEdge740St.Dev_August         |
| 164 | Blue475Ang2ndMoment_August      | RVI-2_June                      |
| 165 | GNDVI.2_July                    | Red650AngCorrelation_June       |
| 166 | NDVI.2_June                     | Green560St.Dev_August           |
| 167 | Green560St.Dev_August           | RedEdge717Dissimilarity_August  |
| 168 | NIR842Ang2ndMoment_July         | NIR842Dissimilarity_August      |
| 169 | RedEdge740Homogeneity_July      | RedEdge740_July                 |
| 170 | WAVI.1_July                     | NIR842_July                     |
| 171 | RedEdge740Ang2ndMoment_July     | WAVI-1_July                     |
| 172 | Red650GLDVAng2ndMoment_August   | NDRE-3_August                   |
| 173 | GDVI.1_August                   | NIR842St.Dev_July               |
| 174 | RedEdge740St.Dev_June           | Blue444Contrast_August          |
| 175 | Green531Homogeneity_July        | Green531_June                   |
| 176 | Blue475_August                  | NDRE-2_June                     |
| 177 | RedEdge705Contrast_July         | NIR842Dissimilarity_June        |
| 178 | RedEdge717Dissimilarity_August  | NIR842GLDVEntropy_June          |
| 179 | Blue444St.Dev_August            | Green531GLDVAng2ndMoment_July   |
| 180 | RedEdge740Entropy_July          | Green560Ang2ndMoment_July       |
| 181 | RedEdge740Dissimilarity_August  | Red650Mean_August               |
| 182 | Red650Mean_August               | NIR842Ang2ndMoment_June         |
| 183 | WAVI.1_August                   | RedEdge705AngCorrelation_July   |
| 184 | Blue475Entropy_August           | Red650GLDVAng2ndMoment_August   |
| 185 | Blue475Entropy_June             | RedEdge740Homogeneity_August    |
| 186 | Green531GLDVAng2ndMoment_August | Blue444_August                  |
| 187 | Red668GLDVAng2ndMoment_June     | NDVI-2_June                     |
| 188 | WAVI.2_August                   | DVI-1_July                      |
| 189 | Blue475_July                    | Green531AngCorrelation_June     |
| 190 | NIR842GLDVEntropy_July          | Red668AngCorrelation_June       |
| 191 | Red650Ang2ndMoment_August       | RedEdge705Dissimilarity_June    |
| 192 | DVI.1_August                    | Blue475Contrast_July            |
| 193 | Green531Dissimilarity_July      | Green560AngCorrelation_July     |
| 194 | Blue475Homogeneity_June         | Red650GLDVEntropy_July          |
| 195 | RERVI.1_June                    | RedEdge740Contrast_July         |

|     |                                 |                                   |
|-----|---------------------------------|-----------------------------------|
| 196 | Blue444Contrast_August          | RedEdge740Entropy_July            |
| 197 | Blue444Entropy_June             | NIR842AngCorrelation_July         |
| 198 | NNIR.1_July                     | RedEdge705Contrast_August         |
| 199 | NDAVI.2_August                  | RedEdge740Dissimilarity_August    |
| 200 | RERVI.1_August                  | RedEdge740Ang2ndMoment_August     |
| 201 | RedEdge705Mean_June             | NIR842Homogeneity_August          |
| 202 | Blue444Ang2ndMoment_August      | Blue475GLDVAng2ndMoment_June      |
| 203 | NIR842Entropy_June              | Red668St.Dev_July                 |
| 204 | Red650Ang2ndMoment_June         | Red668Entropy_July                |
| 205 | RedEdge740Contrast_June         | Blue475Homogeneity_August         |
| 206 | NIR842Homogeneity_July          | RedEdge705GLDVAng2ndMoment_August |
| 207 | Red650Dissimilarity_June        | NIR842St.Dev_August               |
| 208 | Red650GLDVEntropy_July          | NR-1_June                         |
| 209 | GDVI.2_July                     | GRVI-2_July                       |
| 210 | GRVI.1_July                     | Blue444Ang2ndMoment_June          |
| 211 | Blue475AngCorrelation_June      | Blue475Contrast_June              |
| 212 | NG.2_August                     | RedEdge705Mean_June               |
| 213 | NR.1_August                     | Blue444St.Dev_July                |
| 214 | Blue475Dissimilarity_August     | Red650AngCorrelation_July         |
| 215 | RedEdge705Dissimilarity_July    | Red668Contrast_July               |
| 216 | RVI.2_July                      | NIR842Contrast_July               |
| 217 | GRVI.2_July                     | Green531Entropy_August            |
| 218 | NDAVI.2_July                    | RedEdge717Homogeneity_August      |
| 219 | Red668GLDVAng2ndMoment_July     | Green560_June                     |
| 220 | RedEdge717AngCorrelation_August | NDRE-2_August                     |
| 221 | GNDVI.1_July                    | Blue475Mean_June                  |
| 222 | NIR842Ang2ndMoment_June         | NIR842Contrast_June               |
| 223 | Red650Contrast_August           | NIR842Entropy_June                |
| 224 | NNIR.2_August                   | NIR842GLDVAng2ndMoment_June       |
| 225 | NR.1_July                       | Green531Entropy_July              |
| 226 | RedEdge717Mean_June             | RedEdge705GLDVAng2ndMoment_July   |
| 227 | NDRE.2_June                     | RedEdge717Contrast_July           |
| 228 | Red650St.Dev_August             | Blue444Homogeneity_August         |
| 229 | Red668GLDVAng2ndMoment_August   | Red650Entropy_August              |
| 230 | Red668Contrast_August           | RedEdge705Ang2ndMoment_August     |
| 231 | Red650_July                     | Blue475Entropy_June               |
| 232 | RedEdge740GLDVAng2ndMoment_July | Red668Ang2ndMoment_June           |
| 233 | Green560Homogeneity_August      | RedEdge717Contrast_June           |
| 234 | Red668Entropy_July              | RedEdge740Ang2ndMoment_June       |
| 235 | NIR842_June                     | Blue444AngCorrelation_July        |
| 236 | NIR842Dissimilarity_July        | Green531Homogeneity_July          |
| 237 | NDAVI.1_June                    | RedEdge740GLDVAng2ndMoment_July   |
| 238 | NNIR.2_July                     | Red650Homogeneity_August          |
| 239 | Blue475Mean_August              | RedEdge740AngCorrelation_August   |
| 240 | Blue475Ang2ndMoment_June        | RedEdge740GLDVEntropy_August      |
| 241 | Red650Contrast_July             | RedEdge705_June                   |
| 242 | NDVI.1_August                   | NDAVI-1_June                      |
| 243 | RedEdge740St.Dev_July           | Blue444Homogeneity_June           |
| 244 | Blue444Dissimilarity_August     | Green560Homogeneity_June          |
| 245 | Blue475GLDVEntropy_June         | Red650Homogeneity_June            |
| 246 | Blue444Homogeneity_August       | Red668Entropy_June                |

|     |                                 |                                |
|-----|---------------------------------|--------------------------------|
| 247 | Blue475GLDVAng2ndMoment_June    | RedEdge705Contrast_June        |
| 248 | Red668St.Dev_July               | RedEdge705AngCorrelation_June  |
| 249 | Red650Dissimilarity_July        | RedEdge717Mean_June            |
| 250 | RedEdge705GLDVEntropy_July      | RedEdge740Entropy_June         |
| 251 | RedEdge705Entropy_July          | Green531Dissimilarity_July     |
| 252 | Green560Contrast_August         | RedEdge740St.Dev_July          |
| 253 | Green531AngCorrelation_June     | Blue444Entropy_August          |
| 254 | NIR842_July                     | NIR842GLDVEntropy_August       |
| 255 | Red668Homogeneity_July          | RVI-1_July                     |
| 256 | Blue444Contrast_July            | Blue475AngCorrelation_June     |
| 257 | Blue444GLDVAng2ndMoment_August  | Green560AngCorrelation_June    |
| 258 | RedEdge740Dissimilarity_July    | RedEdge717Homogeneity_June     |
| 259 | RedEdge740GLDVAng2ndMoment_June | RedEdge717Dissimilarity_June   |
| 260 | RedEdge717AngCorrelation_July   | RedEdge717Ang2ndMoment_June    |
| 261 | Green560GLDVEntropy_July        | Red650Dissimilarity_July       |
| 262 | RedEdge740Contrast_July         | Red668Homogeneity_July         |
| 263 | RedEdge740Entropy_August        | NIR842Homogeneity_July         |
| 264 | Red668_June                     | NIR842Ang2ndMoment_July        |
| 265 | RedEdge717Entropy_August        | RedEdge740Contrast_August      |
| 266 | Green560Dissimilarity_July      | NIR842Ang2ndMoment_August      |
| 267 | Red650Dissimilarity_August      | RVI-1_August                   |
| 268 | RedEdge705Homogeneity_July      | Blue475Ang2ndMoment_June       |
| 269 | RedEdge705GLDVAng2ndMoment_July | Red650St.Dev_June              |
| 270 | RedEdge740Ang2ndMoment_June     | Blue444Mean_July               |
| 271 | NDVI.1_July                     | Blue475St.Dev_July             |
| 272 | RedEdge717Ang2ndMoment_August   | Blue475GLDVAng2ndMoment_July   |
| 273 | GDVI.2_August                   | Red650Ang2ndMoment_July        |
| 274 | Blue444GLDVEntropy_July         | Red668GLDVEntropy_July         |
| 275 | RedEdge740_August               | RedEdge740Dissimilarity_July   |
| 276 | DVI.1_July                      | Blue444AngCorrelation_August   |
| 277 | NR.2_July                       | Green560Homogeneity_August     |
| 278 | Green560GLDVAng2ndMoment_July   | Green560Ang2ndMoment_August    |
| 279 | Blue475Homogeneity_August       | NIR842Entropy_August           |
| 280 | NIR842GLDVEntropy_June          | RedEdge717_June                |
| 281 | NG.1_July                       | RedEdge705_July                |
| 282 | NDRE.1_June                     | RERVI-2_July                   |
| 283 | Blue444Dissimilarity_July       | RERVI-2_August                 |
| 284 | Red650Homogeneity_July          | Blue475Homogeneity_June        |
| 285 | Red668Contrast_June             | RedEdge705Ang2ndMoment_June    |
| 286 | Red668_August                   | Blue475Mean_July               |
| 287 | Red650Contrast_June             | RedEdge740Homogeneity_July     |
| 288 | RVI.1_July                      | Blue475Dissimilarity_August    |
| 289 | Red668St.Dev_June               | Red668Homogeneity_August       |
| 290 | RedEdge740Entropy_June          | RedEdge705Dissimilarity_August |
| 291 | NNIR.1_August                   | RedEdge717GLDVEntropy_August   |
| 292 | Blue475Contrast_July            | RedEdge740Entropy_August       |
| 293 | Green531GLDVEntropy_July        | NDRE-2_July                    |
| 294 | Red650Homogeneity_August        | Blue444Contrast_June           |
| 295 | RedEdge705_July                 | Blue444St.Dev_June             |
| 296 | Blue444GLDVAng2ndMoment_June    | Green531Ang2ndMoment_June      |
| 297 | Green531St.Dev_July             | Green531GLDVEntropy_June       |



|     |                                 |                                   |
|-----|---------------------------------|-----------------------------------|
| 298 | RedEdge717_July                 | Red668Dissimilarity_June          |
| 299 | Red668Dissimilarity_June        | Red668GLDVEntropy_June            |
| 300 | Green560Homogeneity_July        | RedEdge740GLDVAng2ndMoment_June   |
| 301 | Red650GLDVAng2ndMoment_July     | RedEdge740GLDVEntropy_July        |
| 302 | GDVI.1_July                     | Blue475Contrast_August            |
| 303 | RedEdge705Ang2ndMoment_July     | Green531GLDVEntropy_August        |
| 304 | Green560Ang2ndMoment_August     | Green560GLDVEntropy_August        |
| 305 | Blue444Entropy_July             | Red668Mean_August                 |
| 306 | Green531AngCorrelation_August   | NIR842AngCorrelation_August       |
| 307 | Red650Ang2ndMoment_July         | Blue444Dissimilarity_June         |
| 308 | RVI.1_August                    | Blue444GLDVAng2ndMoment_June      |
| 309 | Red650AngCorrelation_June       | Blue475St.Dev_June                |
| 310 | NDRE.1_August                   | Green560Entropy_June              |
| 311 | Blue475Contrast_June            | Green560GLDVAng2ndMoment_June     |
| 312 | Red668Mean_August               | Red650GLDVEntropy_June            |
| 313 | Red650St.Dev_June               | NIR842Homogeneity_June            |
| 314 | Blue475St.Dev_July              | Blue444GLDVEntropy_July           |
| 315 | Green531Entropy_August          | Green560Dissimilarity_July        |
| 316 | GNDVI.1_August                  | Green560St.Dev_July               |
| 317 | GRVI.1_August                   | RedEdge705GLDVEntropy_July        |
| 318 | RedEdge705Contrast_June         | NIR842GLDVAng2ndMoment_July       |
| 319 | Red668GLDVEntropy_July          | Blue444St.Dev_August              |
| 320 | Red668Contrast_July             | Blue475Ang2ndMoment_August        |
| 321 | WAVI.2_July                     | Blue475GLDVEntropy_August         |
| 322 | NDRE.2_August                   | Green531St.Dev_August             |
| 323 | Green560Entropy_August          | Green560AngCorrelation_August     |
| 324 | Green560St.Dev_July             | Red650St.Dev_August               |
| 325 | Green560AngCorrelation_June     | Red668Contrast_August             |
| 326 | Green531Contrast_June           | Red668St.Dev_August               |
| 327 | RERVI.2_August                  | RedEdge740GLDVAng2ndMoment_August |
| 328 | Blue475Dissimilarity_June       | NIR842Contrast_August             |
| 329 | RedEdge717Homogeneity_June      | Red668_June                       |
| 330 | Blue475GLDVAng2ndMoment_August  | Blue444Entropy_June               |
| 331 | RedEdge705AngCorrelation_June   | Green560Ang2ndMoment_June         |
| 332 | Blue444GLDVAng2ndMoment_July    | Red668GLDVAng2ndMoment_June       |
| 333 | NDRE.2_July                     | RedEdge717GLDVEntropy_June        |
| 334 | Green560GLDVAng2ndMoment_August | RedEdge740Contrast_June           |
| 335 | Green560Homogeneity_June        | NIR842AngCorrelation_June         |
| 336 | NDVI.2_July                     | Blue475Homogeneity_July           |
| 337 | Green531Ang2ndMoment_August     | Blue475Entropy_July               |
| 338 | Green531Homogeneity_June        | Blue475GLDVEntropy_July           |
| 339 | Green531Entropy_July            | RedEdge705Homogeneity_July        |
| 340 | Blue444Ang2ndMoment_July        | RedEdge705St.Dev_July             |
| 341 | Red668AngCorrelation_June       | RedEdge705Entropy_July            |
| 342 | Blue444GLDVEntropy_June         | RedEdge717AngCorrelation_July     |
| 343 | Green560AngCorrelation_August   | Blue444GLDVEntropy_August         |
| 344 | RedEdge740AngCorrelation_June   | Blue475Entropy_August             |
| 345 | GRVI.2_August                   | Green560Entropy_August            |
| 346 | Blue444_June                    | Red650Contrast_August             |
| 347 | Red668Ang2ndMoment_July         | Red650Ang2ndMoment_August         |
| 348 | Blue444Homogeneity_June         | RedEdge717Contrast_August         |

|     |                                 |                                 |
|-----|---------------------------------|---------------------------------|
| 349 | Green531Ang2ndMoment_July       | NDRE-1_August                   |
| 350 | DVI.2_July                      | Blue444GLDVEntropy_June         |
| 351 | RERVI.1_July                    | Blue475GLDVEntropy_June         |
| 352 | RedEdge740_July                 | Green531GLDVAng2ndMoment_June   |
| 353 | Green560Entropy_July            | Green560St.Dev_June             |
| 354 | RedEdge705Homogeneity_June      | Green560GLDVEntropy_June        |
| 355 | Blue444Ang2ndMoment_June        | Red650Entropy_June              |
| 356 | GNDVI.2_August                  | Red650GLDVAng2ndMoment_June     |
| 357 | NDRE.1_July                     | Red668Homogeneity_June          |
| 358 | RedEdge740GLDVEntropy_June      | Red668Contrast_June             |
| 359 | Green560Ang2ndMoment_June       | Red668St.Dev_June               |
| 360 | Blue444Homogeneity_July         | RedEdge705Homogeneity_June      |
| 361 | Red650_August                   | RedEdge705Entropy_June          |
| 362 | Green531GLDVEntropy_June        | RedEdge705GLDVAng2ndMoment_June |
| 363 | RedEdge717Contrast_June         | RedEdge717St.Dev_June           |
| 364 | Red650_June                     | RedEdge717Entropy_June          |
| 365 | Green531Ang2ndMoment_June       | RedEdge717AngCorrelation_June   |
| 366 | Red668Dissimilarity_July        | RedEdge717GLDVAng2ndMoment_June |
| 367 | RERVI.2_July                    | RedEdge740Homogeneity_June      |
| 368 | Blue475GLDVAng2ndMoment_July    | RedEdge740Dissimilarity_June    |
| 369 | Blue475Dissimilarity_July       | RedEdge740GLDVEntropy_June      |
| 370 | Blue475GLDVEntropy_July         | NIR842St.Dev_June               |
| 371 | Blue444Contrast_June            | Blue444Homogeneity_July         |
| 372 | Blue475Entropy_July             | Blue444Contrast_July            |
| 373 | Blue444Dissimilarity_June       | Blue444Dissimilarity_July       |
| 374 | RedEdge717Entropy_June          | Blue444Entropy_July             |
| 375 | Green560Dissimilarity_June      | Blue444Ang2ndMoment_July        |
| 376 | Blue475Homogeneity_July         | Blue444GLDVAng2ndMoment_July    |
| 377 | RedEdge717Dissimilarity_June    | Blue475Dissimilarity_July       |
| 378 | RedEdge717Ang2ndMoment_June     | Blue475Ang2ndMoment_July        |
| 379 | NG.1_2021060810                 | Green531AngCorrelation_July     |
| 380 | Green560GLDVEntropy_June        | Green560GLDVAng2ndMoment_July   |
| 381 | Green560GLDVAng2ndMoment_June   | Red650GLDVAng2ndMoment_July     |
| 382 | Blue475St.Dev_June              | Red668Dissimilarity_July        |
| 383 | RedEdge717GLDVEntropy_June      | Red668Ang2ndMoment_July         |
| 384 | RERVI.3_August                  | Red668GLDVAng2ndMoment_July     |
| 385 | Green560Entropy_June            | RedEdge705Dissimilarity_July    |
| 386 | RedEdge705Ang2ndMoment_June     | RedEdge705Ang2ndMoment_July     |
| 387 | Blue475_June                    | RedEdge717St.Dev_July           |
| 388 | RERVI.3_June                    | NIR842Dissimilarity_July        |
| 389 | RedEdge705Dissimilarity_June    | NIR842GLDVEntropy_July          |
| 390 | Blue444St.Dev_June              | Blue475St.Dev_August            |
| 391 | Green531GLDVAng2ndMoment_June   | Blue475AngCorrelation_August    |
| 392 | RedEdge717GLDVAng2ndMoment_June | Blue475GLDVAng2ndMoment_August  |
| 393 | Green531_June                   | Green531AngCorrelation_August   |
| 394 | RedEdge717AngCorrelation_June   | Green560Dissimilarity_August    |
| 395 | NDRE.3_June                     | Red650Dissimilarity_August      |
| 396 | Green531Dissimilarity_June      | Red650GLDVEntropy_August        |
| 397 | RedEdge717St.Dev_June           | Red668Entropy_August            |
| 398 | Green531St.Dev_June             | Red668Ang2ndMoment_August       |
| 399 | Green560_June                   | Red668AngCorrelation_August     |

|     |                                 |                                 |
|-----|---------------------------------|---------------------------------|
| 400 | Blue475Ang2ndMoment_July        | Red668GLDVAng2ndMoment_August   |
| 401 | Green531Entropy_June            | RedEdge705Homogeneity_August    |
| 402 | RedEdge705_June                 | RedEdge705Entropy_August        |
| 403 | RedEdge740_June                 | RedEdge705AngCorrelation_August |
| 404 | RedEdge705St.Dev_June           | RedEdge705GLDVEntropy_August    |
| 405 | RedEdge705Entropy_June          | RedEdge717Entropy_August        |
| 406 | Green560Ang2ndMoment_July       | NIR842GLDVAng2ndMoment_August   |
| 407 | RedEdge705GLDVAng2ndMoment_June | Red650_July                     |
| 408 | Green560Contrast_June           | Green531Entropy_June            |
| 409 | Green560St.Dev_June             | RedEdge740St.Dev_June           |
| 410 | NDRE.3_August                   | Blue444Dissimilarity_August     |
| 411 | RedEdge717_June                 | Red668Dissimilarity_August      |
| 412 | RERVI.3_July                    | Red668GLDVEntropy_August        |
| 413 | NDRE.3_July                     | RedEdge705St.Dev_August         |
| 414 | RedEdge705GLDVEntropy_June      | RERVI-3_July                    |
